# Supplementary material for: Cobalt-catalyzed annulation of styrenes with α-bromoacetic acids
Source: Royal Society of Chemistry journal article supplement (doi:10.1039/d0ra09588e), 2021-01-01

### Cobalt-catalyzed annulation of styrenes with $\alpha$ -bromoacetic acids

Tung T. Nguyen,<sup>\*,a,b</sup> Bao H. T. Ngo,<sup>a,b</sup> Huy X. Le,<sup>a,b</sup> Linh N. P. Vu,<sup>a,b</sup> Tuong A. To,<sup>a,b</sup>  
Anh N. Q. Phan,<sup>a,b</sup> Nam T. S. Phan<sup>\*,a,b</sup>

<sup>a</sup>Faculty of Chemical Engineering, HCMC University of Technology, VNU-HCM, 268  
Ly Thuong Kiet, District 10, Ho Chi Minh City, Vietnam

<sup>b</sup>Vietnam National University Ho Chi Minh City, Linh Trung Ward, Thu Duc District,  
Ho Chi Minh City, Vietnam.

Email: [tungtn@hcmut.edu.vn](mailto:tungtn@hcmut.edu.vn); [ptsnam@hcmut.edu.vn](mailto:ptsnam@hcmut.edu.vn)

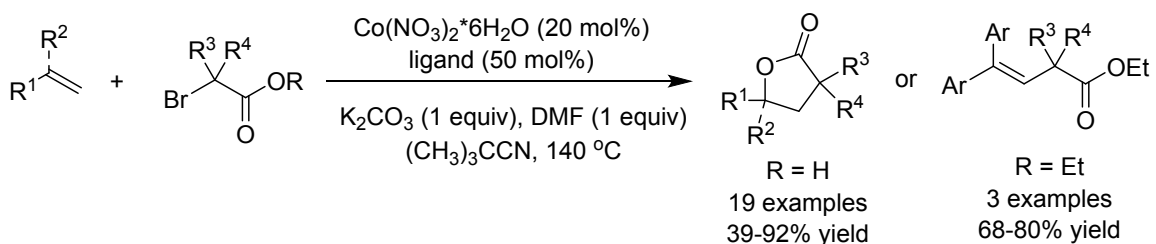

### Supporting information

## 1. Materials and instrumentation

All reagents and starting materials were obtained commercially from Sigma-Aldrich, Acros and Merck, and were used as received without any further purification unless otherwise noted. Gas chromatographic (GC) analyses were performed using a Shimadzu GC 2010-Plus equipped with a flame ionization detector (FID) and an SPB-5 column (length = 30 m, inner diameter = 0.25 mm, and film thickness = 0.25  $\mu\text{m}$ ). GC-MS analyses were analyzed on a Shimadzu GCMS-QP2010Ultra with a ZB-5MS column (length = 30 m, inner diameter = 0.25 mm, and film thickness = 0.25  $\mu\text{m}$ ). The  $^1\text{H}$  NMR and  $^{13}\text{C}$  NMR were recorded on Bruker AV 500 spectrometers using residual solvent peak as a reference. Without notice, chemical shifts are reported in ppm and referenced to the residual peak for  $\text{CDCl}_3$  ( $\delta = 7.26$  ppm for  $^1\text{H}$  NMR and  $\delta = 77.16$  ppm for  $^{13}\text{C}$  NMR). Splitting is reported with the following symbols: s = singlet, d = doublet, t = triplet, q = quartet, dd = doublet of doublets, td = triplet of doublets, dt = doublet of triplets, and m = multiplet. Coupling constants ( $J$ ) are reported in Hertz. HR-MS spectra were recorded by an Agilent HPLC 1200 Series coupled to Bruker micrOTOF-QII.

## 2. Optimization of reaction conditions

### 2.1. General procedure

To a 10 mL Schlenk tube equipped with a magnetic stir bar was added 1,1-diphenylethylene **1a** (0.1 mmol, 18 mg),  $\alpha$ -bromophenylacetic acid **2a**, cobalt catalyst, ligand, base and dried solvent (1 mL). The reaction tube was flushed with argon for 5 min, capped, then placed into a preheated bath. After being cooled to room temperature, the crude mixture was added diphenyl ether (0.2 mmol, 34 mg) internal standard. An aliquot of the crude mixture was withdrawn and diluted with ethyl acetate (2 mL) and

brine (3 mL). The aqueous layer was extracted with ethyl acetate (2 mL x 3). The combined organic layers were washed with saturated NaHCO<sub>3</sub> (aqueous solution, 1 mL), dried over Na<sub>2</sub>SO<sub>4</sub>, filtered, and analyzed with GC with respect to the internal standard.

## 2.2. Effect of reaction temperature

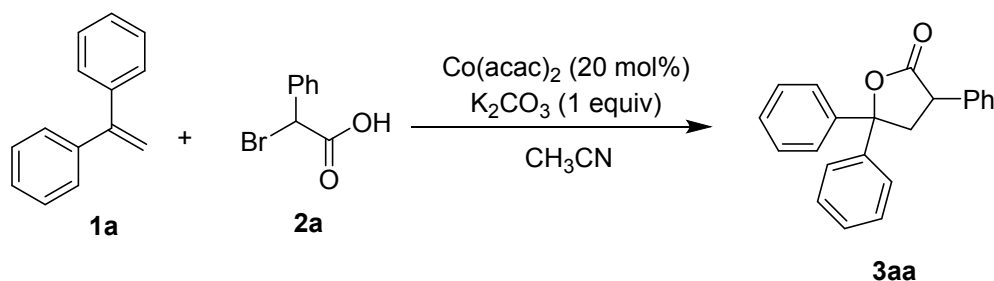

| Entry | temperature, °C | yield of <b>3aa</b> , % |
|-------|-----------------|-------------------------|
| 1     | 80              | trace                   |
| 2     | 100             | 12                      |
| 3     | 120             | 37                      |
| 4     | <b>140</b>      | <b>69</b>               |

Reaction conditions: **2a** (0.2 mmol), Co(acac)<sub>2</sub> (0.02 mmol), K<sub>2</sub>CO<sub>3</sub> (0.1 mmol), CH<sub>3</sub>CN (1 mL), under argon, for 24 h. Yields are GC yields.

## 2.3. Effect of catalyst

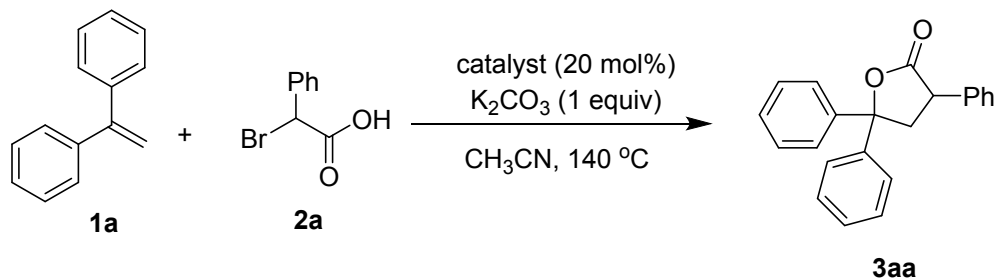

| Entry | catalyst              | ligand | yield of <b>3aa</b> , % |
|-------|-----------------------|--------|-------------------------|
| 1     | Co(acac) <sub>2</sub> | -      | 69                      |

|   |                                                       |                                                                                          |           |
|---|-------------------------------------------------------|------------------------------------------------------------------------------------------|-----------|
| 2 | Co(acac) <sub>3</sub>                                 | -                                                                                        | trace     |
| 3 | Co(OAc) <sub>2</sub>                                  | -                                                                                        | 57        |
| 4 | CoCl <sub>2</sub>                                     | -                                                                                        | trace     |
| 5 | Co(NO <sub>3</sub> ) <sub>2</sub> ·6H <sub>2</sub> O  | -                                                                                        | trace     |
| 6 | Co(NO <sub>3</sub> ) <sub>2</sub> ·6H <sub>2</sub> O  | 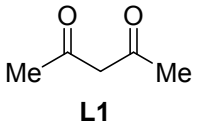<br>L1  | 70        |
| 7 | <b>Co(NO<sub>3</sub>)<sub>2</sub>·6H<sub>2</sub>O</b> | <br>L2  | <b>78</b> |
| 8 | Co(NO <sub>3</sub> ) <sub>2</sub> ·6H <sub>2</sub> O  | <br>L3  | 27        |
| 9 | Co(NO <sub>3</sub> ) <sub>2</sub> ·6H <sub>2</sub> O  | <br>L4 | 52        |

Reaction conditions: **2a** (0.2 mmol), catalyst (0.02 mmol), ligand (0.05 mmol), K<sub>2</sub>CO<sub>3</sub> (0.1 mmol), CH<sub>3</sub>CN (1 mL), under argon, for 24 h. Yields are GC yields.

#### 2.4. Effect of base

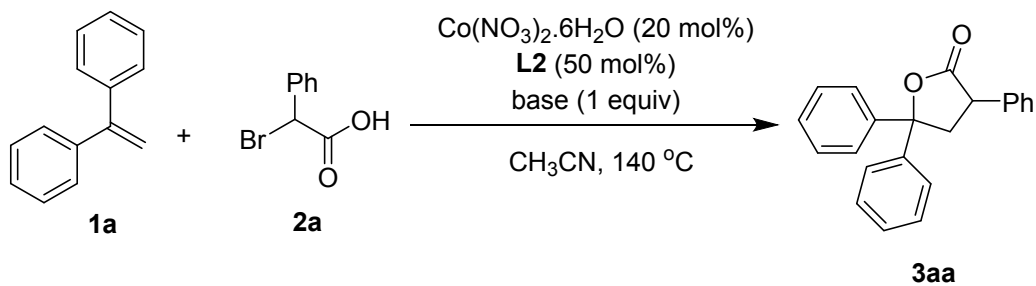

| Entry                | base                                     | yield of <b>3aa</b> , % |
|----------------------|------------------------------------------|-------------------------|
| 1                    | K <sub>2</sub> CO <sub>3</sub>           | 78                      |
| 2                    | Na <sub>2</sub> CO <sub>3</sub>          | 67                      |
| 3                    | Cs <sub>2</sub> CO <sub>3</sub>          | trace                   |
| 4                    | KOAc                                     | trace                   |
| 5                    | K <sub>3</sub> PO <sub>4</sub>           | 32                      |
| 6                    | KOPiv                                    | trace                   |
| 7                    | KHCO <sub>3</sub>                        | 62                      |
| <b>8<sup>a</sup></b> | <b>K<sub>2</sub>CO<sub>3</sub> + DMF</b> | <b>84</b>               |

Reaction conditions: **2a** (0.2 mmol), Co(NO<sub>3</sub>)<sub>2</sub>·6H<sub>2</sub>O (0.02 mmol), **L2** (0.05 mmol), base (0.1 mmol), CH<sub>3</sub>CN (1 mL), under argon, for 24 h. Yields are GC yields. <sup>a</sup> K<sub>2</sub>CO<sub>3</sub> (0.1 mmol) and DMF (0.1 mmol) were used as bases.

## 2.5. Effect of solvent

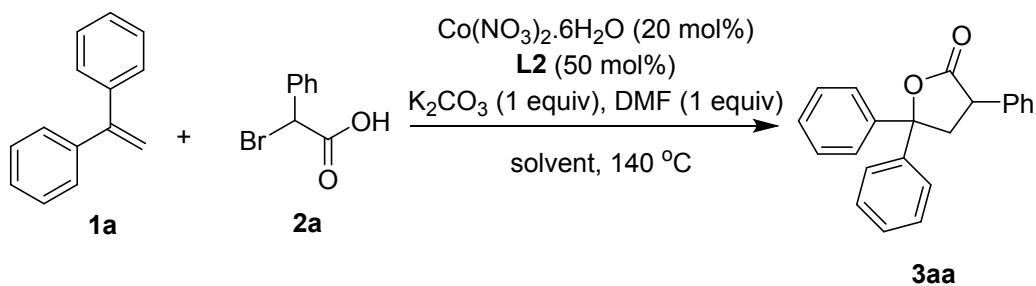

| Entry | base               | yield of <b>3aa</b> , % |
|-------|--------------------|-------------------------|
| 1     | CH <sub>3</sub> CN | 78                      |
| 2     | 1,4-dioxane        | 75                      |
| 3     | DMF                | 81                      |

|          |                                        |           |
|----------|----------------------------------------|-----------|
| 4        | DMSO                                   | trace     |
| 5        | toluene                                | trace     |
| <b>6</b> | <b>(CH<sub>3</sub>)<sub>3</sub>CCN</b> | <b>91</b> |
| 7        | PhCN                                   | trace     |
| 8        | CF <sub>3</sub> CH <sub>2</sub> OH     | trace     |
| 9        | (CF <sub>3</sub> ) <sub>2</sub> CHOH   | trace     |

Reaction conditions: **2a** (0.2 mmol), Co(NO<sub>3</sub>)<sub>2</sub>·6H<sub>2</sub>O (0.02 mmol), **L2** (0.05 mmol), K<sub>2</sub>CO<sub>3</sub> (0.1 mmol), DMF (0.1 mmol), solvent (1 mL), under argon, for 24 h. Yields are GC yields.

### 3. Annulation of styrenes and $\alpha$ -bromoacetic acids/ $\alpha$ -bromoacetates

#### 3.1. General procedures

**Procedure 1 (Schemes 2 and 4):** To a 25 mL Schlenk tube equipped with a magnetic stir bar was added a styrene derivative (0.5 mmol), an  $\alpha$ -bromoacetic acid or ethyl ester, Co(NO<sub>3</sub>)<sub>2</sub>·6H<sub>2</sub>O (0.1 mmol, 18 mg), **L2** (0.25 mmol, 26 mg), K<sub>2</sub>CO<sub>3</sub> (0.5 mmol, 69 mg), DMF (0.5 mmol, 37 mg), and (CH<sub>3</sub>)<sub>3</sub>CN (5 mL). The reaction tube was flushed with argon for 5 min, capped, then placed into a preheated bath (at 140 °C). After being cooled to room temperature, the crude mixture was diluted with ethyl acetate (5 mL) and brine (10 mL). The aqueous layer was extracted with ethyl acetate (5 mL x 3). The combined organic layers were washed with saturated NaHCO<sub>3</sub> (aqueous solution, 10 mL), then dried over Na<sub>2</sub>SO<sub>4</sub>, and filtered. After concentrated under vacuum, the crude product was purified by column chromatography using hexanes/ethyl acetate eluent to afford the desired  $\gamma$ -lactone or the vinyl acetate.

**Procedure 2 (for Scheme 3):** similar to procedure 1, except: (i) no DMF was used, and (ii) reactions was run at 100 °C.

### 3.2. Characterization data of products

#### 3,5,5-Triphenyldihydrofuran-2(3H)-one (3aa)<sup>1</sup>

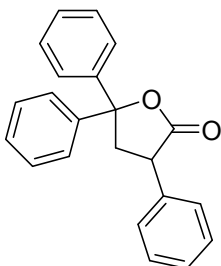

134 mg (85%); white solid. M.p. 108-110 °C. <sup>1</sup>H NMR (500 MHz, CDCl<sub>3</sub>, ppm) δ 7.47 (d, *J* = 7.8 Hz, 2H), 7.41 – 7.20 (m, 13H, overlapping with CHCl<sub>3</sub> signal), 3.77 (dd, *J* = 12.8, 8.0 Hz, 1H), 3.43 (dd, *J* = 12.7, 8.0 Hz, 1H), 2.92 (t, *J* = 12.8 Hz, 1H). <sup>13</sup>C NMR (126 MHz, CDCl<sub>3</sub>, ppm) δ 175.9, 143.6, 142.2, 135.9, 128.9, 128.8, 128.6, 128.2, 128.1, 128.0, 127.8, 125.4, 125.3, 87.2, 46.5, 44.6.

---

<sup>1</sup> Wei, X.-J.; Yang, D.-T.; Wang, L.; Song, T.; Wu, L.-Z.; Liu, Q. *Org. Lett.*, **2013**, *15*, 6054.

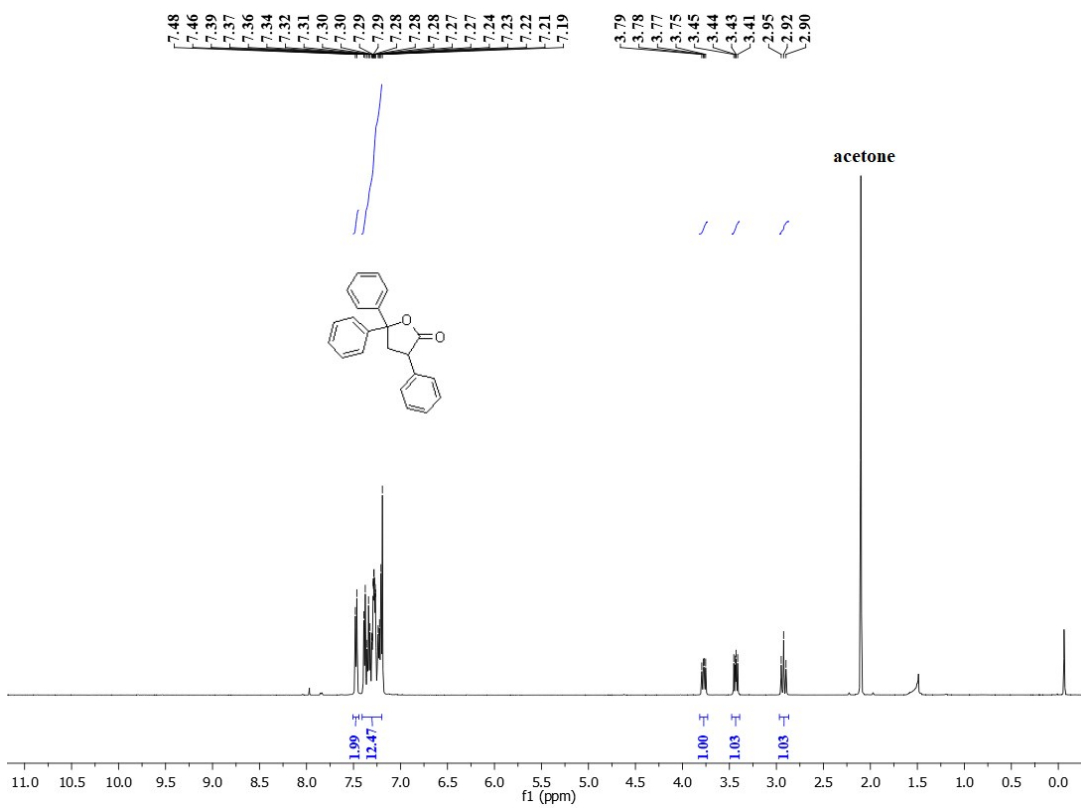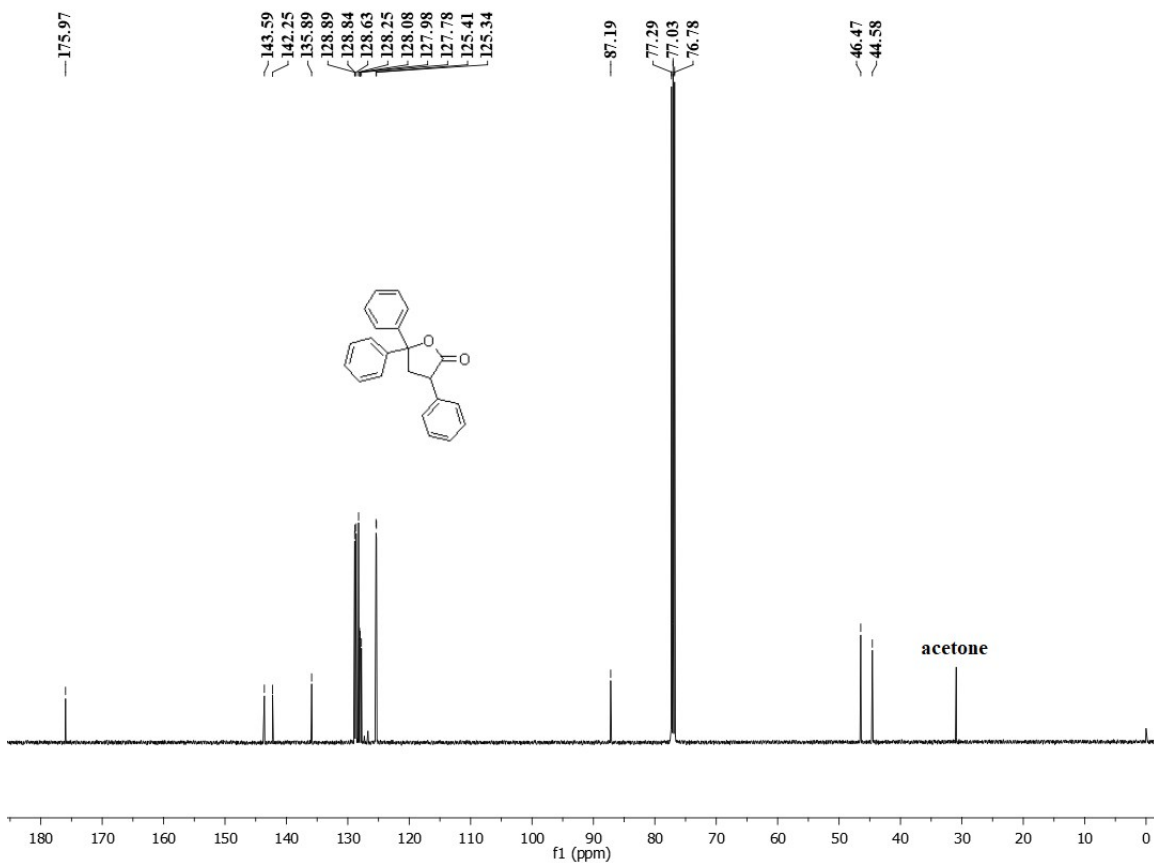



### 3,5-Diphenyldihydrofuran-2(3H)-one (3ab)<sup>2</sup>

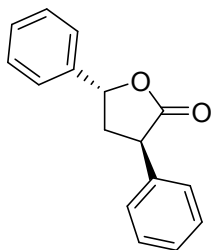

96 mg (81%); colorless oil which slowly solidified under air. <sup>1</sup>H NMR (500 MHz, CDCl<sub>3</sub>, ppm) δ 7.48 – 7.38 (m, 7H), 7.36 – 7.29 (m, 3H), 5.75 – 5.69 (m, 1H), 3.98 (t, *J* = 8.4 Hz, 1H), 2.88 (dt, *J* = 13.1, 7.6 Hz, 1H), 2.75 (ddd, *J* = 13.1, 9.0, 5.4 Hz, 1H). <sup>13</sup>C NMR (126 MHz, CDCl<sub>3</sub>, ppm) δ 177.1, 139.4, 136.5, 129.1, 128.9, 128.4, 127.7, 125.1, 78.8, 45.2, 39.3. One carbon signal could not be located.

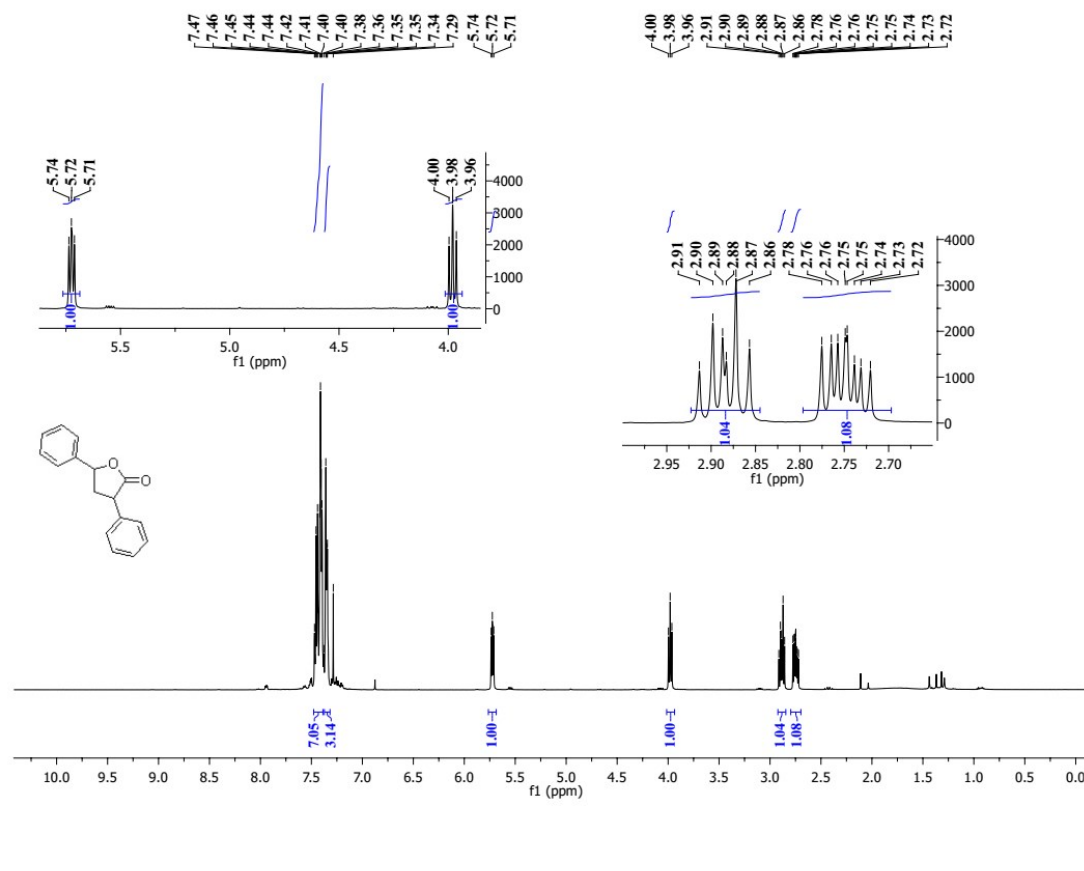

<sup>2</sup> Domingo, L. R.; Gil, S.; Parra, M.; Segura, J. *Molecules* **2018**, *13*, 1303.

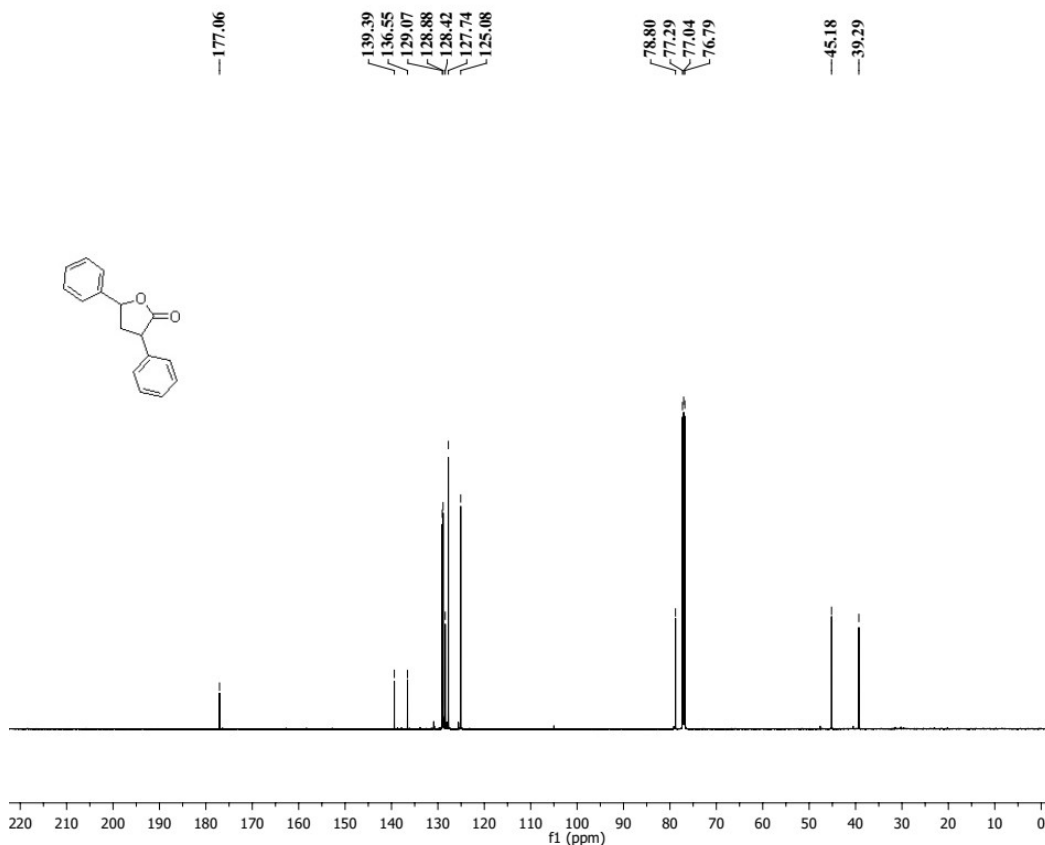

### 5-(3-Bromophenyl)-3-phenyldihydrofuran-2(3H)-one (3ca)

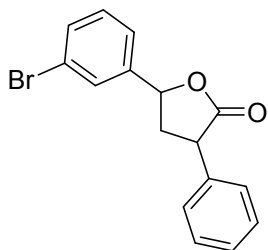

122 mg (77%); colorless oil which slowly solidified under air. <sup>1</sup>H NMR (500 MHz, CDCl<sub>3</sub>, ppm) δ 7.46 (s, 1H), 7.44 – 7.41 (m, 1H), 7.32 (t, *J* = 7.3 Hz, 2H), 7.24 (dt, *J* = 15.1, 6.8 Hz, 5H), 5.57 (dd, *J* = 7.2, 5.7 Hz, 1H), 3.90 – 3.82 (m, 1H), 2.79 (dt, *J* = 13.1, 7.5 Hz, 1H), 2.61 (ddd, *J* = 13.1, 9.0, 5.5 Hz, 1H). <sup>13</sup>C NMR (126 MHz, CDCl<sub>3</sub>, ppm) δ 176.6, 141.7, 136.2, 131.5, 130.5, 129.1, 128.2, 127.9, 127.7, 123.6, 123.1, 77.8, 45.0, 39.2. HRMS (ESI) calcd. for C<sub>16</sub>H<sub>14</sub><sup>79</sup>BrO<sub>2</sub> [M+H]<sup>+</sup>: 317.0172; found: 317.0167.

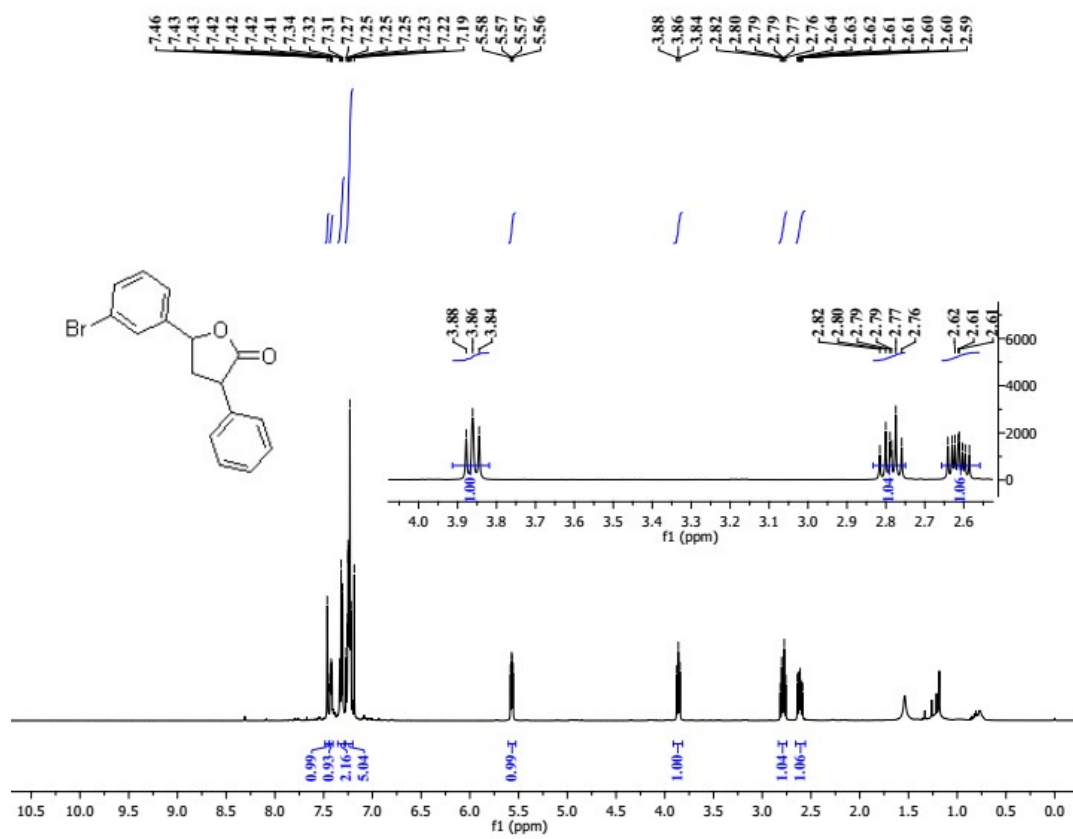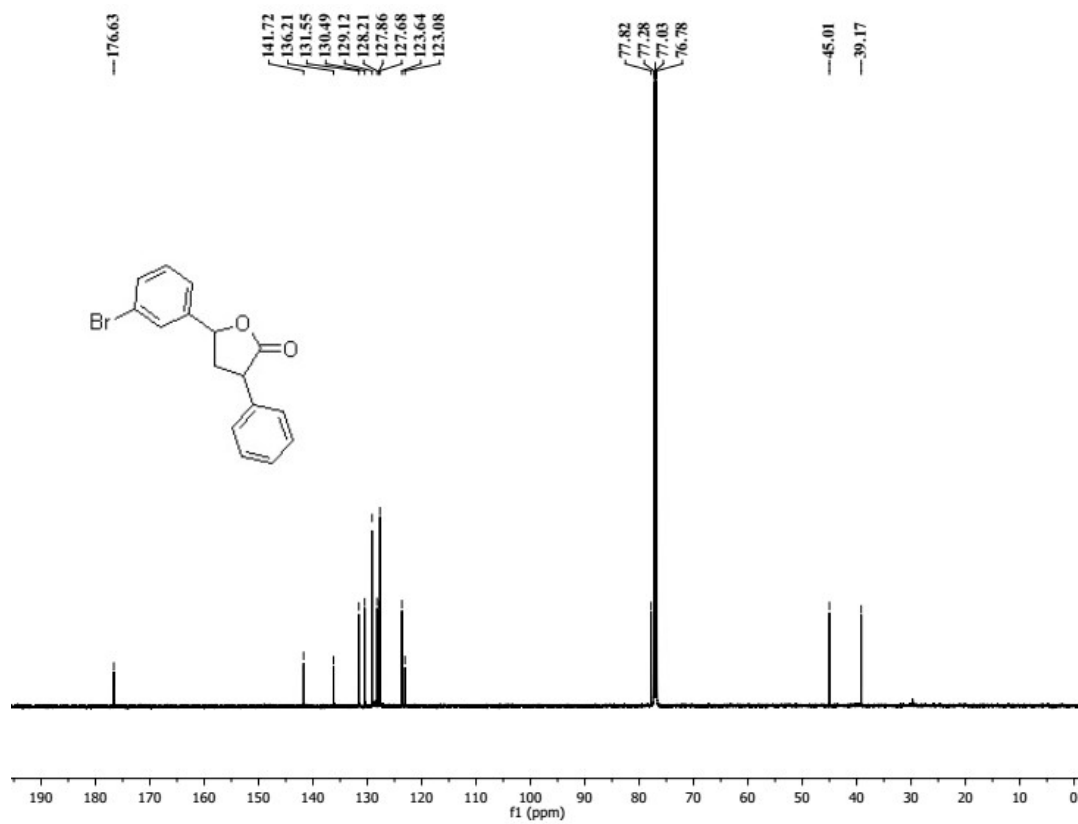

**5-(4-Chlorophenyl)-3-phenyldihydrofuran-2(3H)-one (3da)**

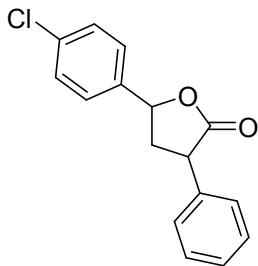

124 mg (91%); colorless oil.  $^1\text{H}$  NMR (500 MHz,  $\text{CDCl}_3$ , ppm)  $\delta$  7.38 – 7.22 (both isomers, m, 9H), 5.60 – 5.56 (minor, m, 1H), 5.42 (major, dd,  $J = 10.7, 5.6$  Hz, 1H), 3.98 (major, dd,  $J = 12.8, 8.4$  Hz, 1H), 3.89 – 3.84 (minor, m, 1H), 3.01 (major, ddd,  $J = 13.0, 8.4, 5.7$  Hz, 1H), 2.78 (minor, dt,  $J = 13.2, 7.4$  Hz, 1H), 2.60 (minor, ddd,  $J = 13.1, 9.0, 5.6$  Hz, 1H), 2.28 (major, td,  $J = 12.8, 10.8$  Hz, 1H).  $^{13}\text{C}$  NMR (126 MHz,  $\text{CDCl}_3$ , ppm, only major isomer was shown)  $\delta$  176.1, 137.2, 135.8, 134.6, 129.1, 129.0, 128.1, 127.9, 126.9, 78.3, 47.5, 40.4. HRMS (ESI) calcd. for  $\text{C}_{16}\text{H}_{14}^{35}\text{ClO}_2$   $[\text{M}+\text{H}]^+$ : 273.0677; found: 273.0671.

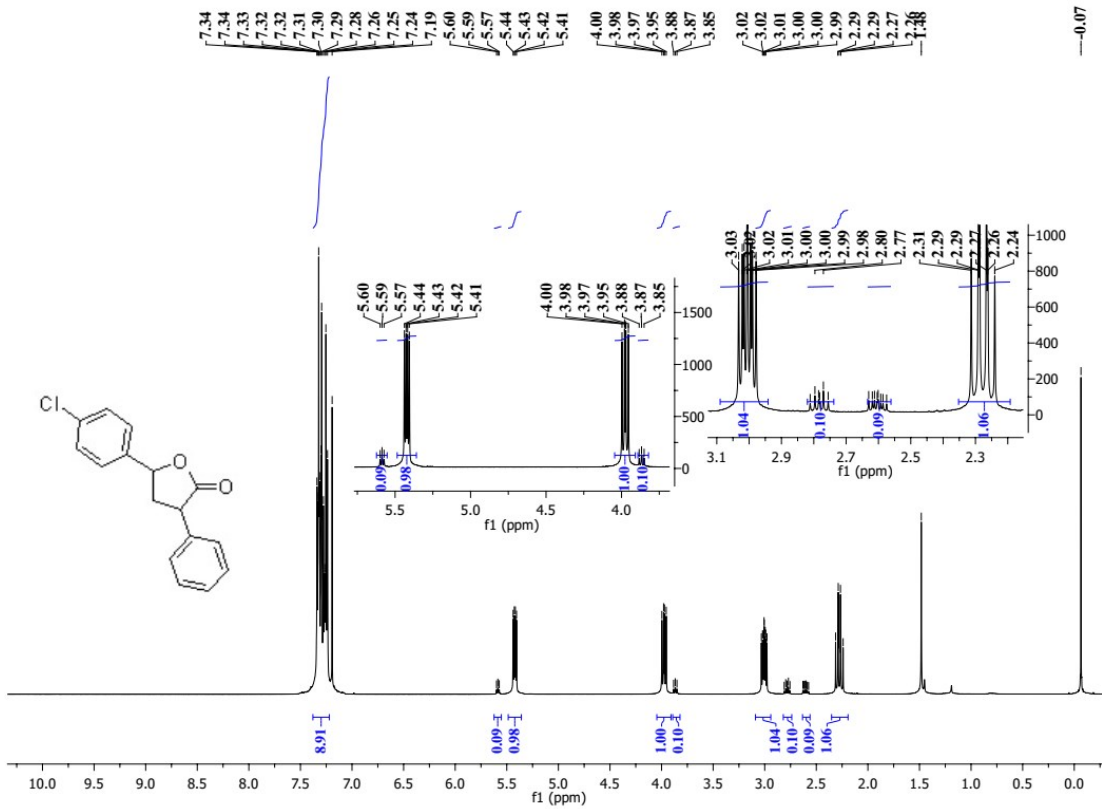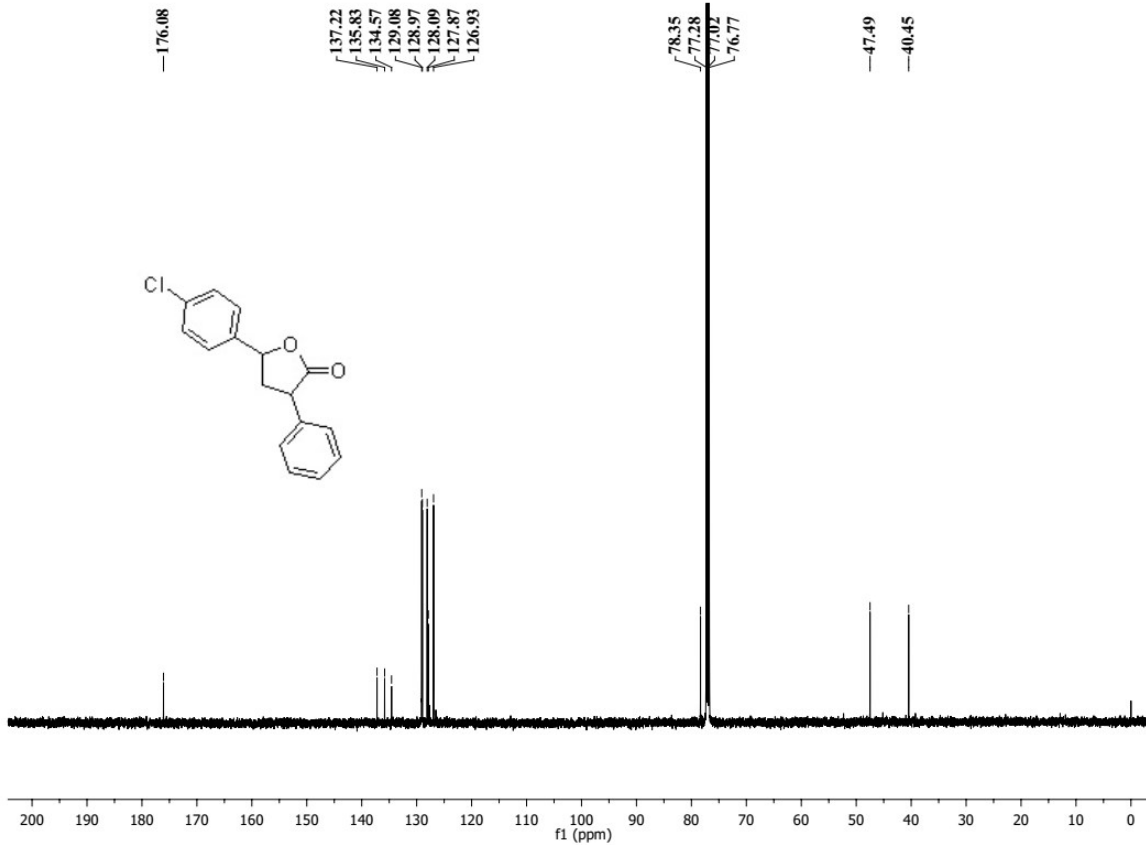

**4-(5-Oxo-4-phenyltetrahydrofuran-2-yl)phenyl acetate (3ea)**

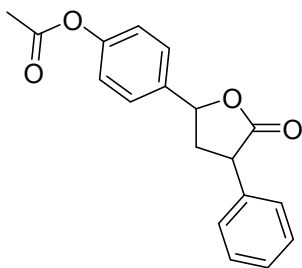

116 mg (78%); colorless oil which slowly solidified under air.  $^1\text{H}$  NMR (500 MHz,  $\text{CDCl}_3$ , ppm)  $\delta$  7.40 – 7.29 (both isomers, m, 4H), 7.27 – 7.24 (both isomers, m, 3H), 7.08 (both isomers, d,  $J = 8.5$  Hz, 2H), 5.65 – 5.57 (major, m, 1H), 5.44 (minor, dd,  $J = 10.7, 5.6$  Hz, 1H), 3.97 (minor, dd,  $J = 12.8, 8.4$  Hz, 1H), 3.88 (major, t,  $J = 8.3$  Hz, 1H), 3.04 – 2.95 (minor, m, 1H), 2.83 – 2.72 (major, m, 1H), 2.68 – 2.59 (major, m, 1H), 2.38 – 2.21 (minor, m, 1H), 2.25 (both isomers, s, 3H).  $^{13}\text{C}$  NMR (125 MHz,  $\text{CDCl}_3$ , ppm, possible peaks for both isomers are listed)  $\delta$  176.9, 176.3, 169.45, 169.40, 150.8, 150.6, 136.9, 136.4, 136.2, 135.9, 129.4, 129.1, 128.9, 128.6, 128.1, 127.8, 127.8, 127.7, 126.8, 126.3, 122.10, 122.07, 78.6, 78.3, 47.6, 45.1, 40.5, 39.3, 21.1. HRMS (ESI) calcd. for  $\text{C}_{18}\text{H}_{17}\text{O}_4$   $[\text{M}+\text{H}]^+$ : 297.1121; found: 297.1120.

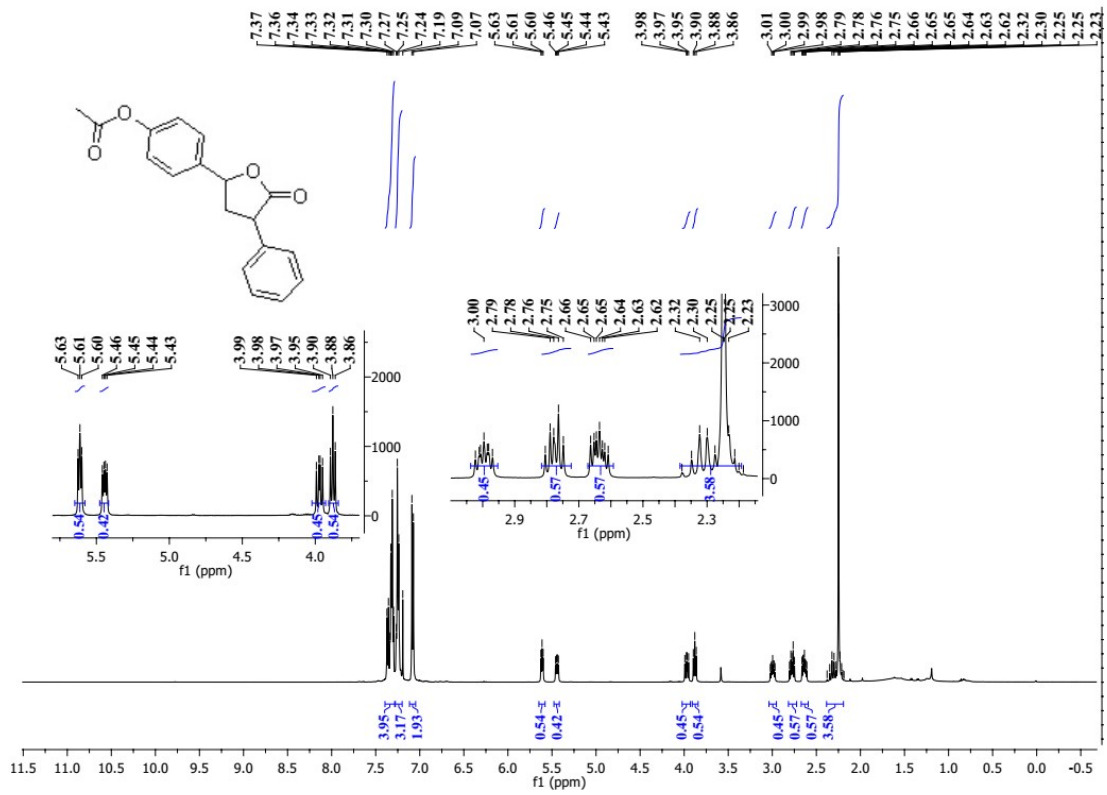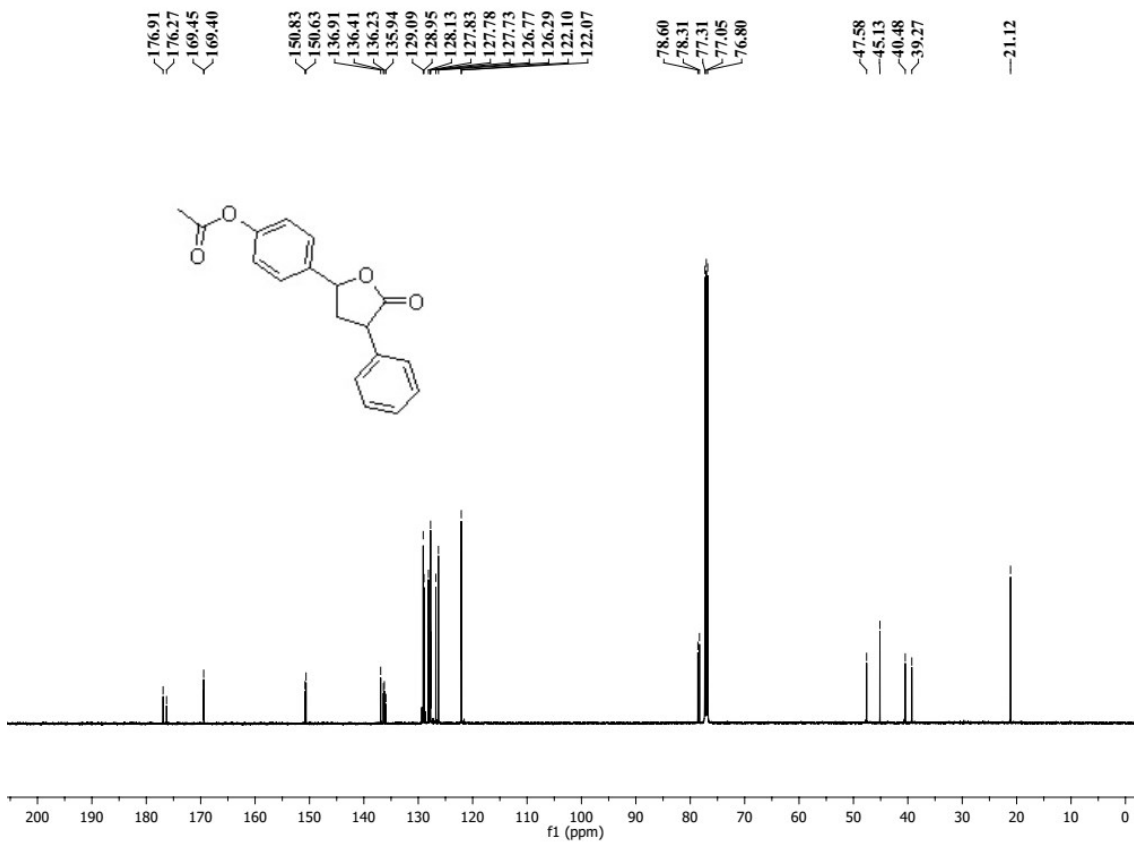

**5-(4-Nitrophenyl)-3-phenyldihydrofuran-2(3H)-one (3fa)**

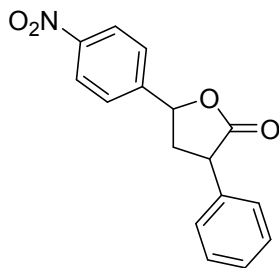

86 mg (61%); colorless oil.  $^1\text{H}$  NMR (500 MHz,  $\text{CDCl}_3$ , ppm)  $\delta$  8.22 (d,  $J = 8.7$  Hz, 2H), 7.53 (d,  $J = 8.7$  Hz, 2H), 7.34 – 7.20 (m, 5H), 5.55 (dd,  $J = 10.7, 5.8$  Hz, 1H), 4.02 (dd,  $J = 12.7, 8.5$  Hz, 1H), 3.11 (ddd,  $J = 12.9, 8.5, 5.8$  Hz, 1H), 2.27 (td,  $J = 12.8, 10.8$  Hz, 1H).  $^{13}\text{C}$  NMR (125 MHz,  $\text{CDCl}_3$ , ppm)  $\delta$  175.6, 148.0, 145.9, 135.4, 129.0, 128.05, 128.02, 126.1, 124.2, 47.2, 40.3, 29.7. HRMS (ESI) calcd. for  $\text{C}_{16}\text{H}_{14}\text{NO}_4$   $[\text{M}+\text{H}]^+$ : 284.0917; found: 284.0911.

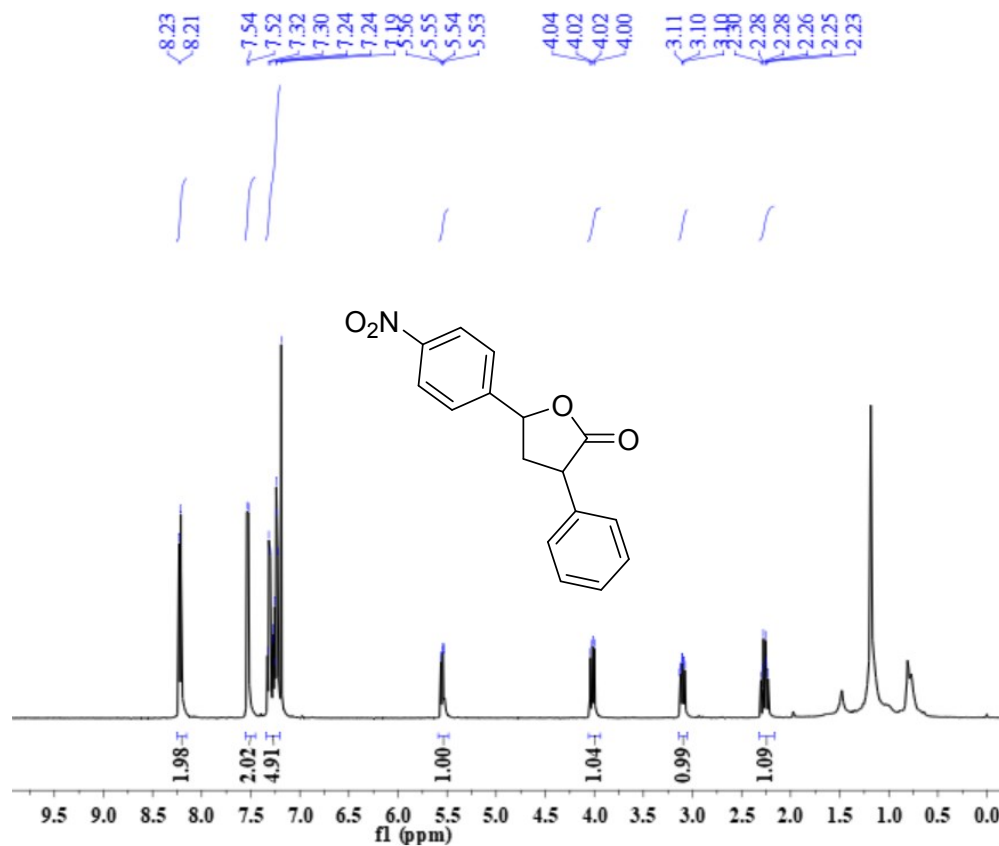



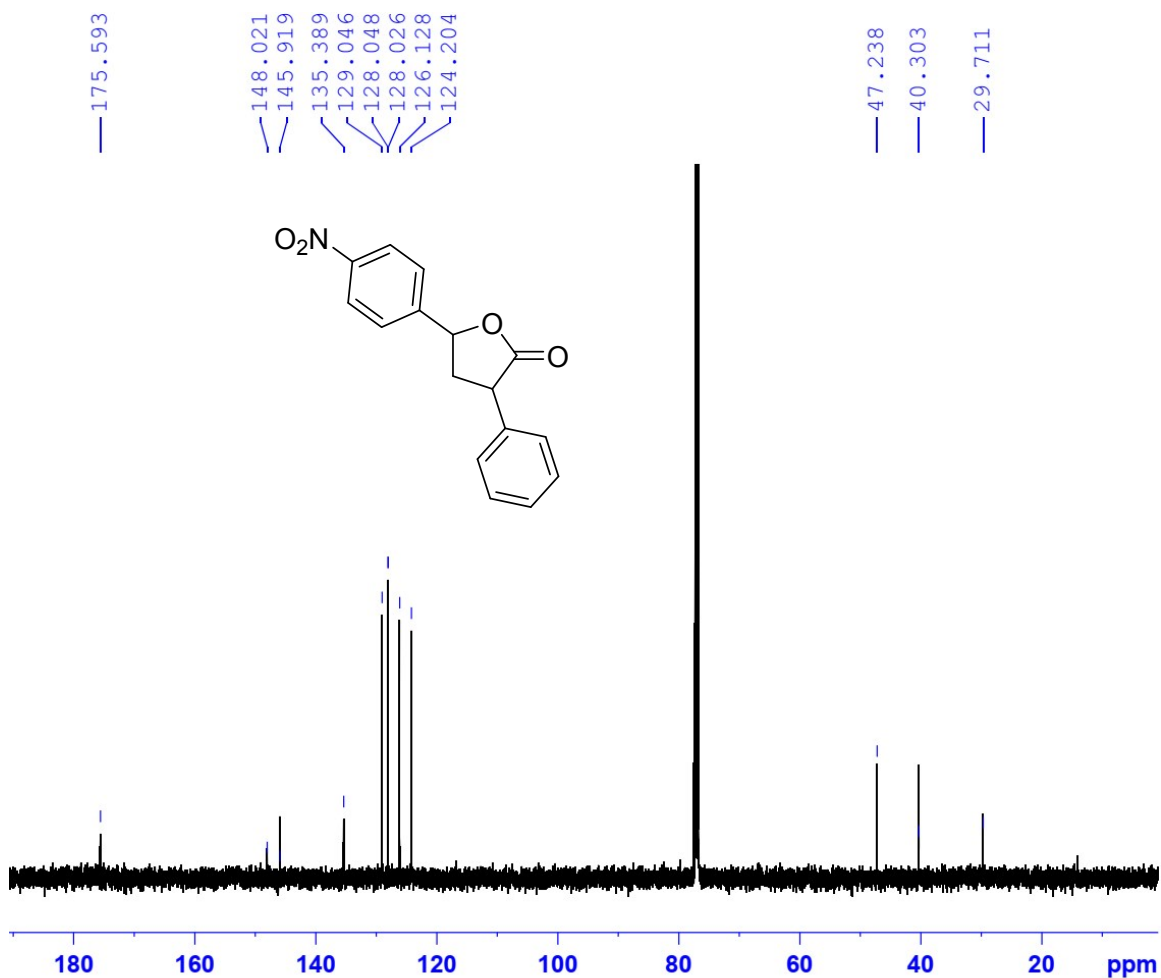

**5-(3-Nitrophenyl)-3-phenyldihydrofuran-2(3H)-one (3ga)**

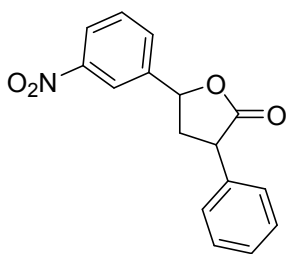

91 mg (64%); light yellow oil. <sup>1</sup>H NMR (500 MHz, CDCl<sub>3</sub>, ppm) δ 8.22 – 8.13 (m, 2H), 7.68 (d, *J* = 7.6 Hz, 1H), 7.55 (dd, *J* = 10.5, 5.3 Hz, 1H), 7.38 – 7.30 (m, 2H), 7.26 (d, *J* = 7.5 Hz, 3H), 5.68 (t, *J* = 6.7 Hz, 1H), 3.94 – 3.85 (m, 1H), 2.93 – 2.78 (m, 1H), 2.66 (ddd, *J* = 13.3, 9.0, 6.1 Hz, 1H). <sup>13</sup>C NMR (125 MHz, CDCl<sub>3</sub>, ppm) δ 176.2, 148.6, 141.6,

135.9, 131.1, 130.1, 129.2, 128.0, 127.6, 123.4, 120.3, 77.6, 45.1, 39.0. HRMS (ESI)

calcd. for  $C_{16}H_{14}NO_4$   $[M+H]^+$ : 284.0917; found: 284.0921.

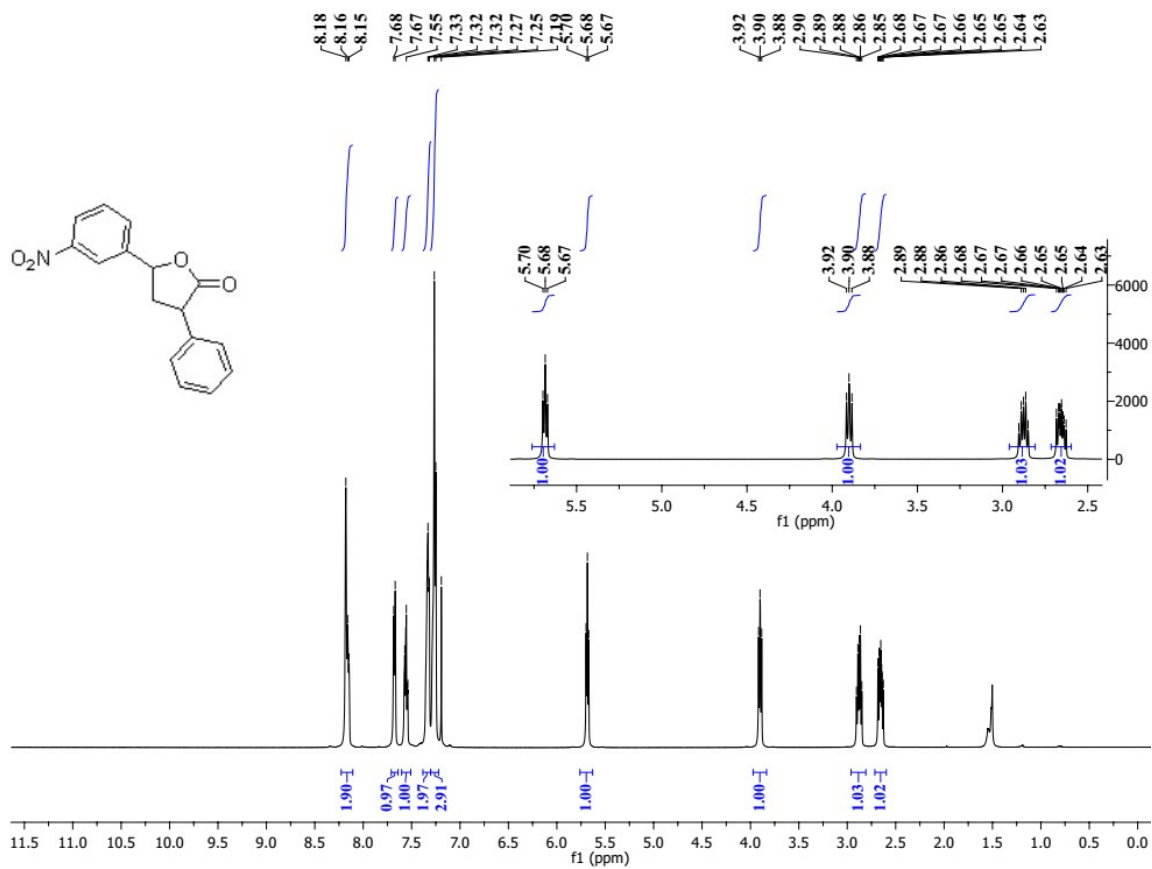

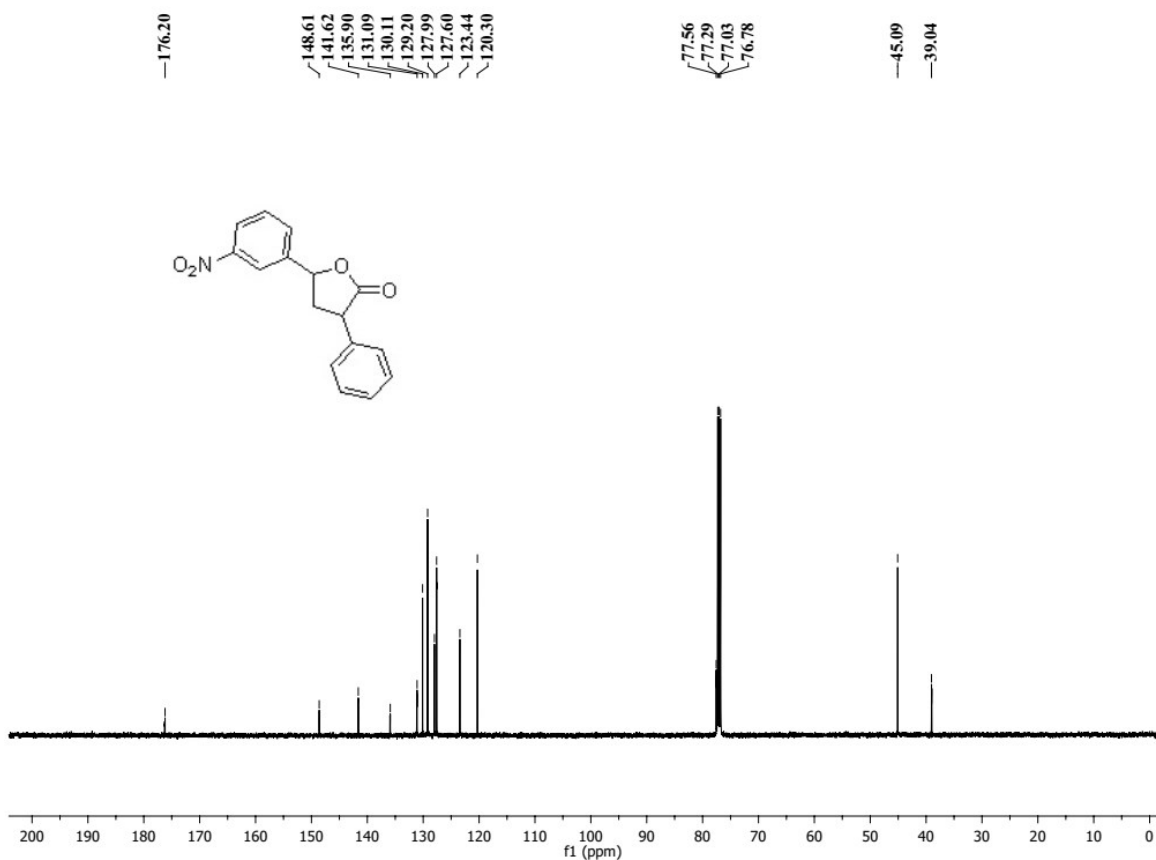

### 5-(Naphthalen-2-yl)-3-phenyldihydrofuran-2(3H)-one (3ha)

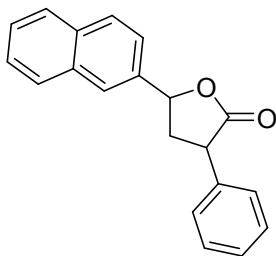

127 mg (88%); colorless oil.  $^1\text{H}$  NMR (500 MHz,  $\text{CDCl}_3$ , ppm)  $\delta$  7.84 – 7.78 (m, 4H), 7.49 – 7.40 (m, 3H), 7.34 – 7.21 (m, 5H), 5.61 (dd,  $J = 10.7, 5.7$  Hz, 1H), 4.02 (dd,  $J = 12.8, 8.5$  Hz, 1H), 3.07 (ddd,  $J = 12.9, 8.5, 5.7$  Hz, 1H), 2.41 (td,  $J = 12.8, 10.8$  Hz, 1H).  $^{13}\text{C}$  NMR (125 MHz,  $\text{CDCl}_3$ , ppm)  $\delta$  176.4, 136.1, 136.0, 133.3, 133.1, 128.94, 128.89, 128.2, 128.1, 127.8, 126.6, 126.5, 124.8, 123.0, 79.27, 47.64, 40.49. One carbon signal

could not be located. HRMS (ESI) calcd. for  $C_{20}H_{17}O_2$   $[M+H]^+$ : 289.1223; found: 289.1231.

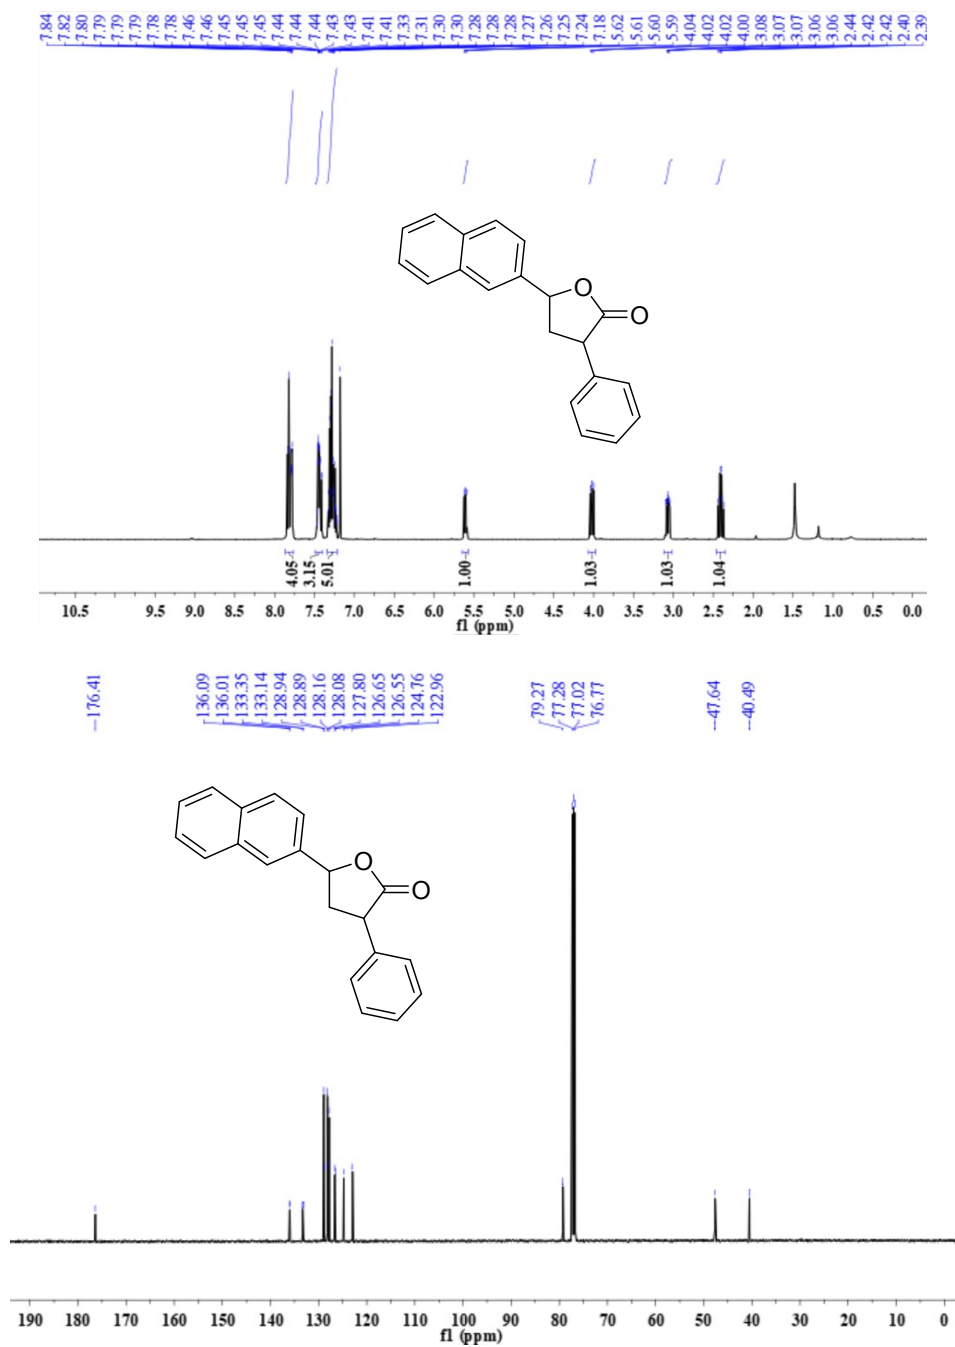

**5-(4-Methylthiazol-5-yl)-3-phenyldihydrofuran-2(3H)-one (3ja)**

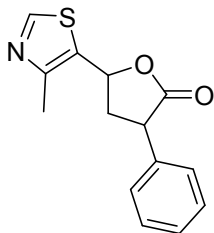

84 mg (65%); brown oil which slowly solidified under air.  $^1\text{H}$  NMR (500 MHz,  $\text{CDCl}_3$ , ppm)  $\delta$  8.69 (major, s, 1H), 8.67 (minor, s, 1H), 7.37 – 7.30 (both isomers, m, 2H), 7.29 – 7.21 (both isomers, m, 3H), 5.83 (minor, t,  $J = 6.7$  Hz, 1H), 5.71 (major, dd,  $J = 10.8, 5.5$  Hz, 1H), 4.04 (minor, dd,  $J = 9.1, 6.9$  Hz, 1H), 3.98 (major, dd,  $J = 12.7, 8.4$  Hz, 1H), 3.07 (major, ddd,  $J = 13.7, 8.4, 5.6$  Hz, 1H), 2.83 (minor, dt,  $J = 13.9, 7.0$  Hz, 1H), 2.69 (minor, ddd,  $J = 13.4, 9.2, 6.2$  Hz, 1H), 2.46 (major, s, 3H), 2.43 (minor, s, 3H), 2.41 – 2.34 (both isomers, m, 1H).  $^{13}\text{C}$  NMR (126 MHz,  $\text{CDCl}_3$ , ppm)  $\delta$  175.8 (minor), 175.4 (major), 152.02 (major), 151.96 (minor), 151.6 (minor), 151.5 (major), 136.0 (minor), 135.6 (major), 129.7 (minor), 129.2 (major), 129.1 (minor), 129.0 (major), 128.1 (major), 128.00 (major), 127.98 (minor), 127.5 (minor), 73.0 (minor), 72.7 (major), 47.5 (major), 45.6 (minor), 41.0 (major), 39.2 (minor), 15.50 (minor), 15.47 (major). HRMS (ESI) calcd. for  $\text{C}_{14}\text{H}_{14}\text{NO}_2\text{S}$   $[\text{M}+\text{H}]^+$ : 260.0740; found: 260.0732.

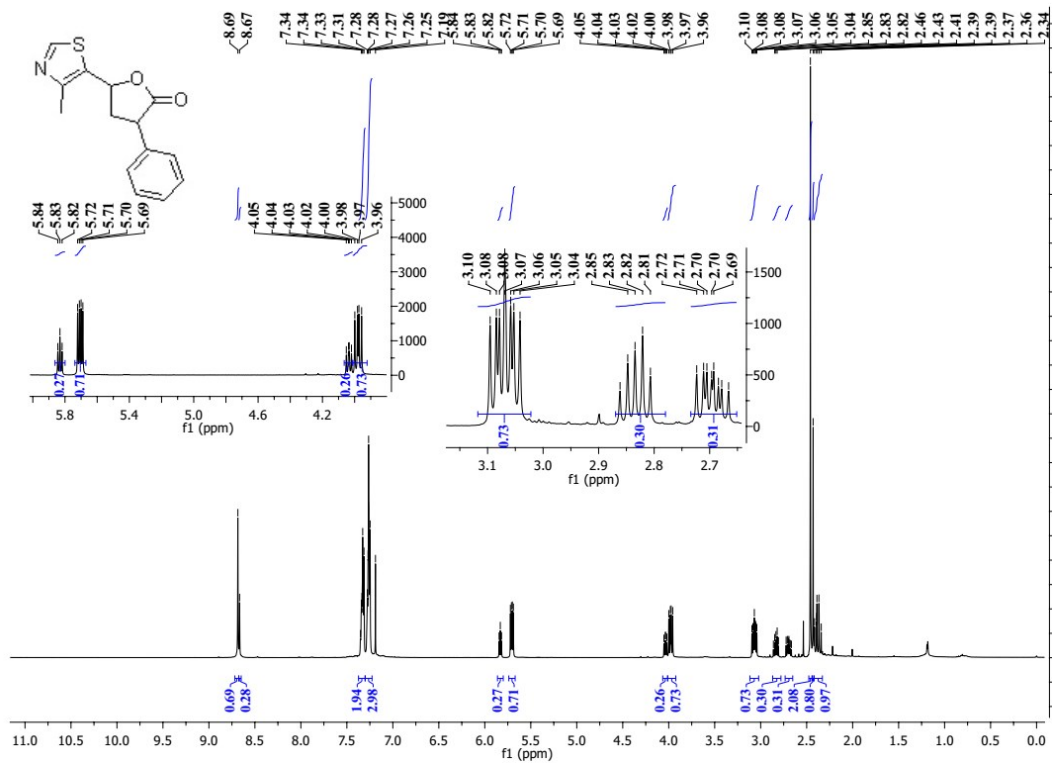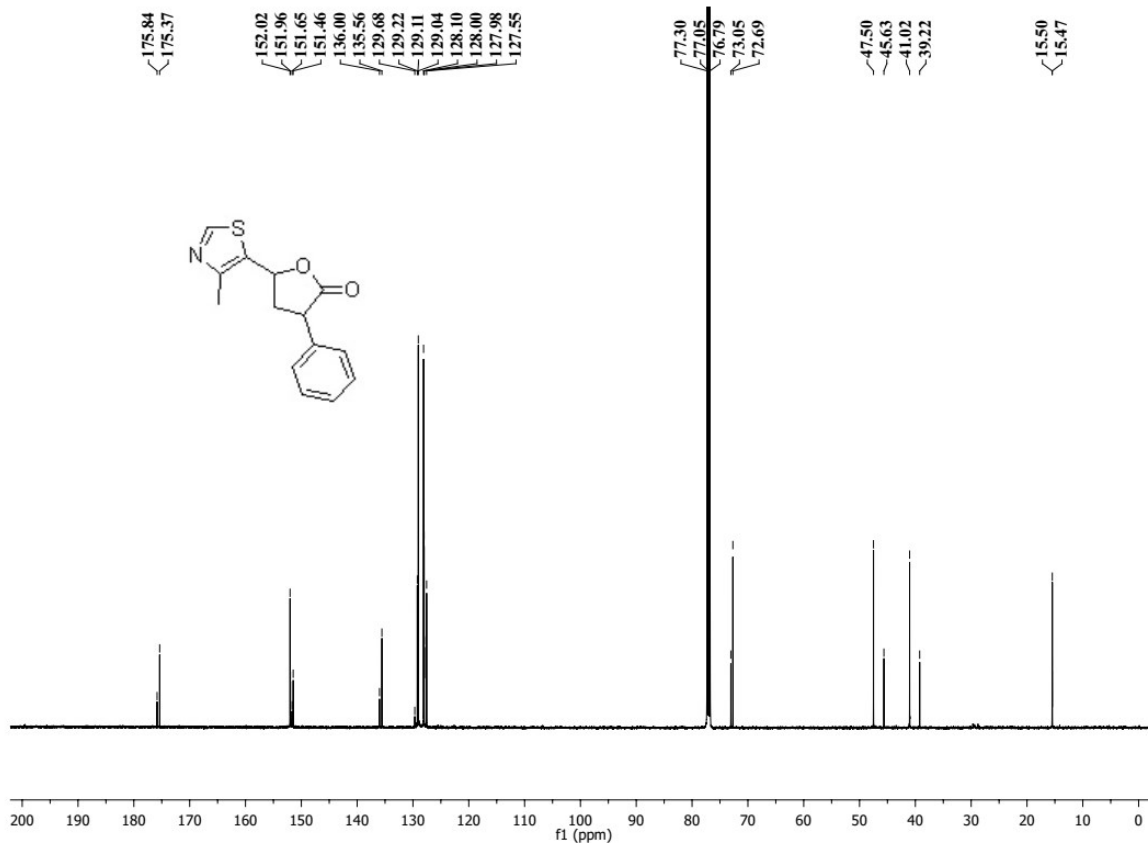

### 3-(2-Chlorophenyl)-5-(naphthalen-2-yl)dihydrofuran-2(3H)-one (3hb)

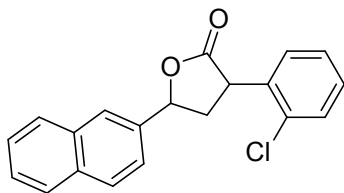

63 mg (39%); white amorphous solid.  $^1\text{H}$  NMR (500 MHz,  $\text{CDCl}_3$ , ppm)  $\delta$  7.84 (d,  $J = 8.5$  Hz, 1H), 7.82 – 7.77 (m, 3H), 7.49 – 7.43 (m, 2H), 7.36 (dd,  $J = 6.1, 4.1$  Hz, 2H), 7.28 – 7.19 (m, 3H), 5.78 (t,  $J = 6.3$  Hz, 1H), 4.28 (t,  $J = 8.8$  Hz, 1H), 2.81 – 2.76 (m, 2H).  $^{13}\text{C}$  NMR (126 MHz,  $\text{CDCl}_3$ , ppm)  $\delta$  176.5, 136.6, 135.0, 134.1, 133.16, 133.12, 130.2, 129.4, 129.2, 129.0, 128.1, 127.8, 127.5, 126.7, 126.5, 124.0, 122.8, 78.9, 43.8, 38.3. HRMS (ESI) calcd. for  $\text{C}_{20}\text{H}_{16}^{35}\text{ClO}_2$   $[\text{M}+\text{H}]^+$ : 323.0833; found: 323.0827.

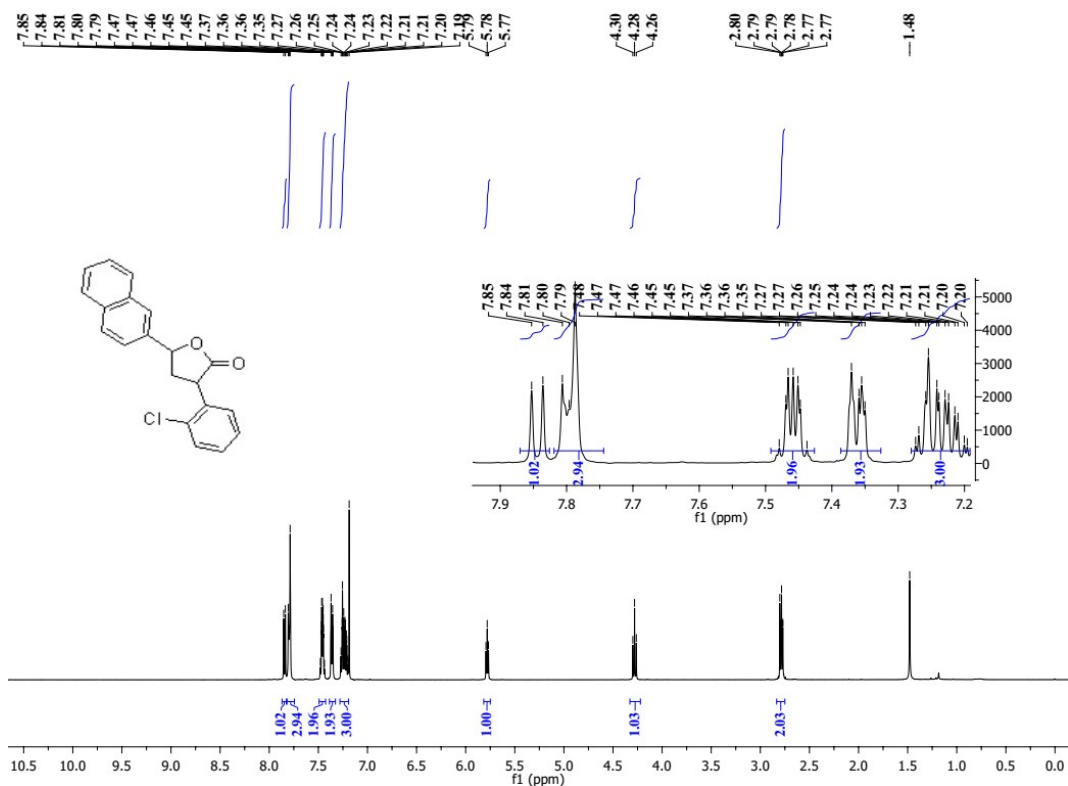

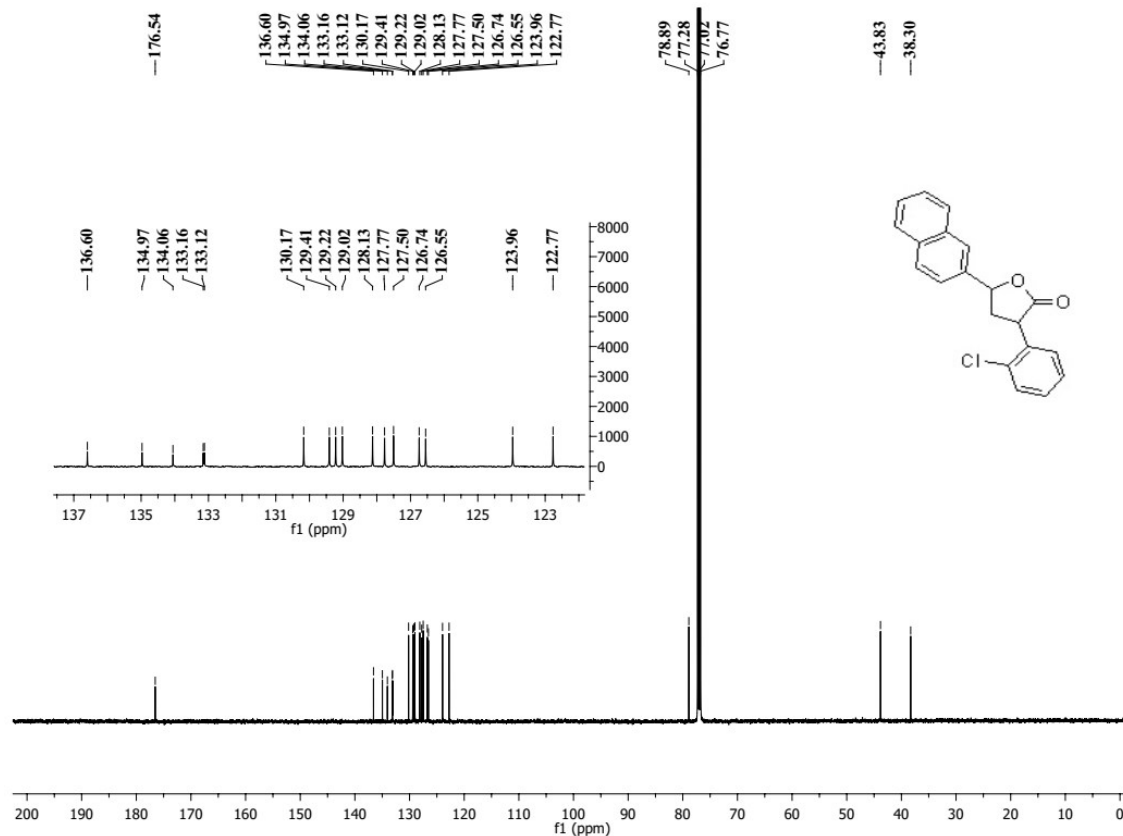

### 3-(4-Chlorophenyl)-5,5-diphenyldihydrofuran-2(3H)-one (3ac)

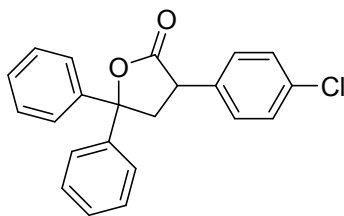

122 mg (70% yield); colorless oil. <sup>1</sup>H NMR (500 MHz, CDCl<sub>3</sub>, ppm) δ 7.45 (d, *J* = 7.8 Hz, 2H), 7.39 – 7.20 (m, 10H), 7.16 – 7.11 (m, 2H), 3.74 (dd, *J* = 12.9, 7.9 Hz, 1H), 3.42 (dd, *J* = 12.6, 7.9 Hz, 1H), 2.87 (t, *J* = 12.8 Hz, 1H). <sup>13</sup>C NMR (125 MHz, CDCl<sub>3</sub>, ppm) δ 175.5, 143.4, 142.0, 134.3, 133.8, 129.6, 129.0, 128.9, 128.7, 128.2, 128.1, 125.4, 125.3, 87.3, 45.8, 44.3. HRMS (ESI) calcd. for C<sub>22</sub>H<sub>18</sub><sup>35</sup>ClO<sub>2</sub> [M+H]<sup>+</sup>: 349.0990; found: 349.0997.



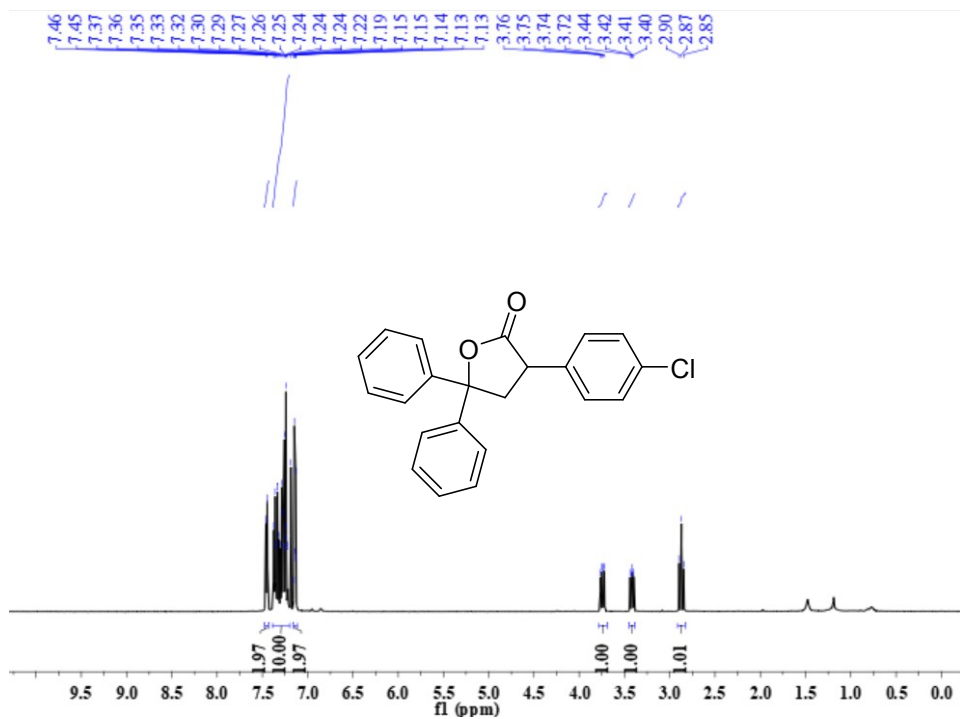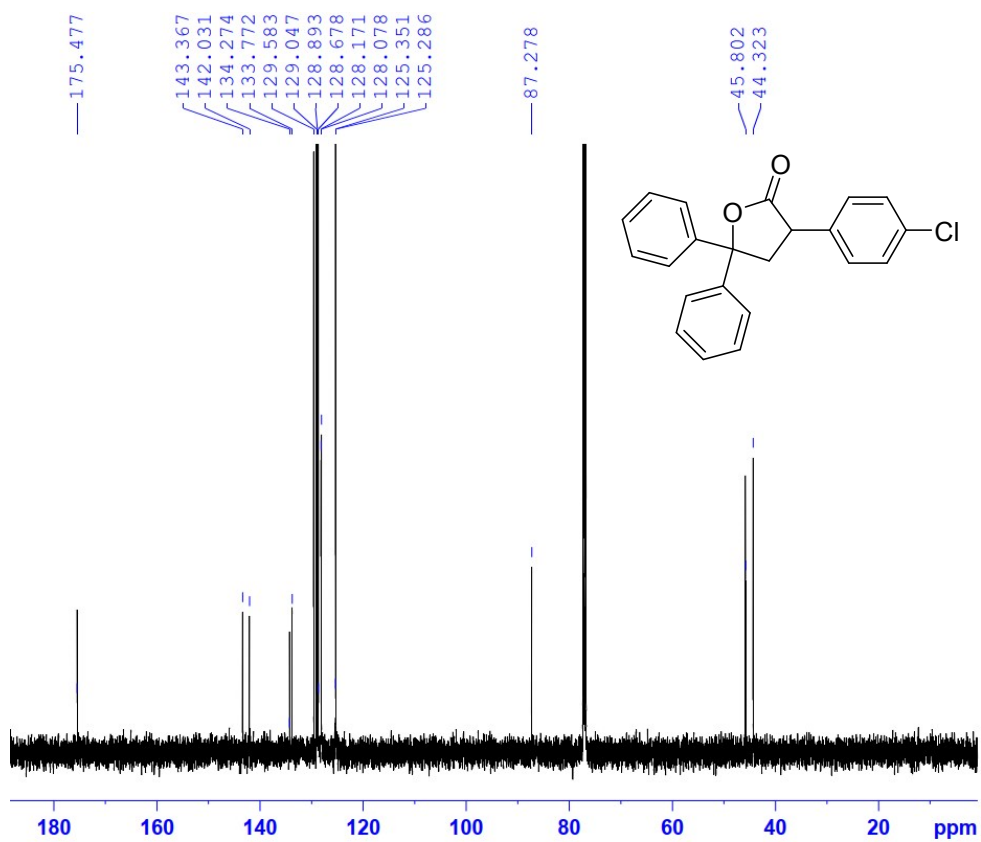

3,3-Dimethyl-5,5-diphenyldihydrofuran-2(3H)-one (5a)<sup>3</sup>

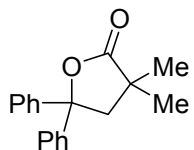

116 mg (87%); colorless oil.  $^1\text{H}$  NMR (500 MHz,  $\text{CDCl}_3$ , ppm)  $\delta$  7.46 (d,  $J = 8.0$  Hz, 4H), 7.32 (t,  $J = 7.5$  Hz, 4H), 7.23 (t,  $J = 7.5$  Hz, 2H), 2.92 (s, 2H), 1.14 (s, 6H).  $^{13}\text{C}$  NMR (125 MHz,  $\text{CDCl}_3$ , ppm)  $\delta$  181.3, 144.8, 128.7, 127.7, 125.1, 86.2, 50.0, 40.7, 25.9.

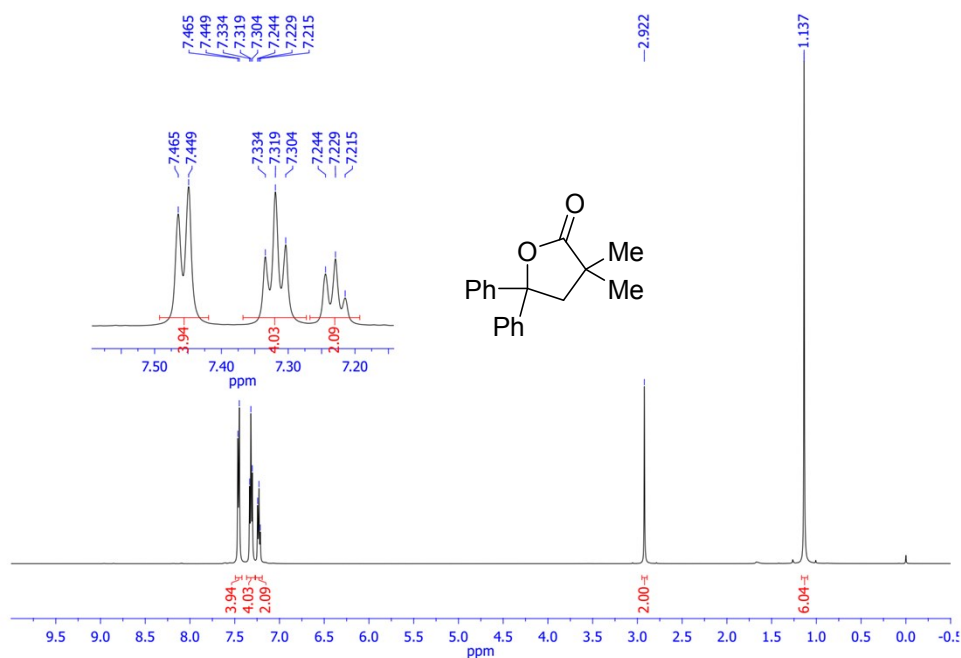

<sup>3</sup> Iwasaki, M.; Miki, N.; Ikemoto, Y.; Ura, Y.; Nishihara, Y. *Org. Lett.* **2018**, *20*, 3848.

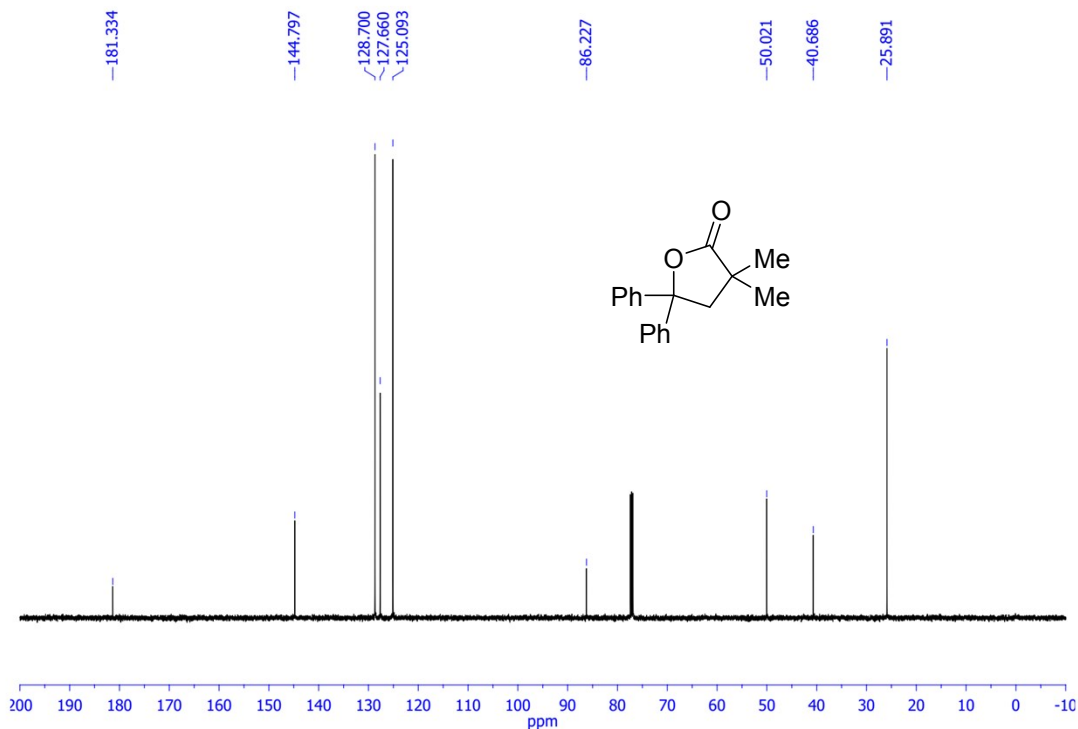

**5-(3-Bromophenyl)-3,3-dimethyldihydrofuran-2(3H)-one (5c)**

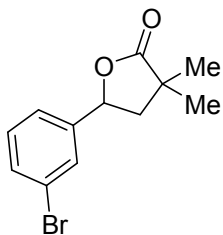

104 mg (78%); colorless oil.  $^1\text{H}$  NMR (500 MHz,  $\text{CDCl}_3$ , ppm)  $\delta$  7.43 (s, 1H), 7.41 – 7.38 (m, 1H), 7.21 – 7.18 (m, 2H), 5.34 (dd,  $J = 9.9, 6.4$  Hz, 1H), 2.42 (dd,  $J = 12.9, 6.3$  Hz, 1H), 1.97 (dd,  $J = 12.8, 9.9$  Hz, 1H), 1.30 (s, 3H), 1.24 (s, 3H).  $^{13}\text{C}$  NMR (126 MHz,  $\text{CDCl}_3$ )  $\delta$  181.2, 141.9, 131.4, 130.3, 128.3, 123.8, 122.9, 76.6, 46.0, 40.7, 24.9, 24.2. HRMS (ESI) calcd. for  $\text{C}_{12}\text{H}_{14}^{79}\text{BrO}_2$   $[\text{M}+\text{H}]^+$ : 269.0172; found: 269.0178.

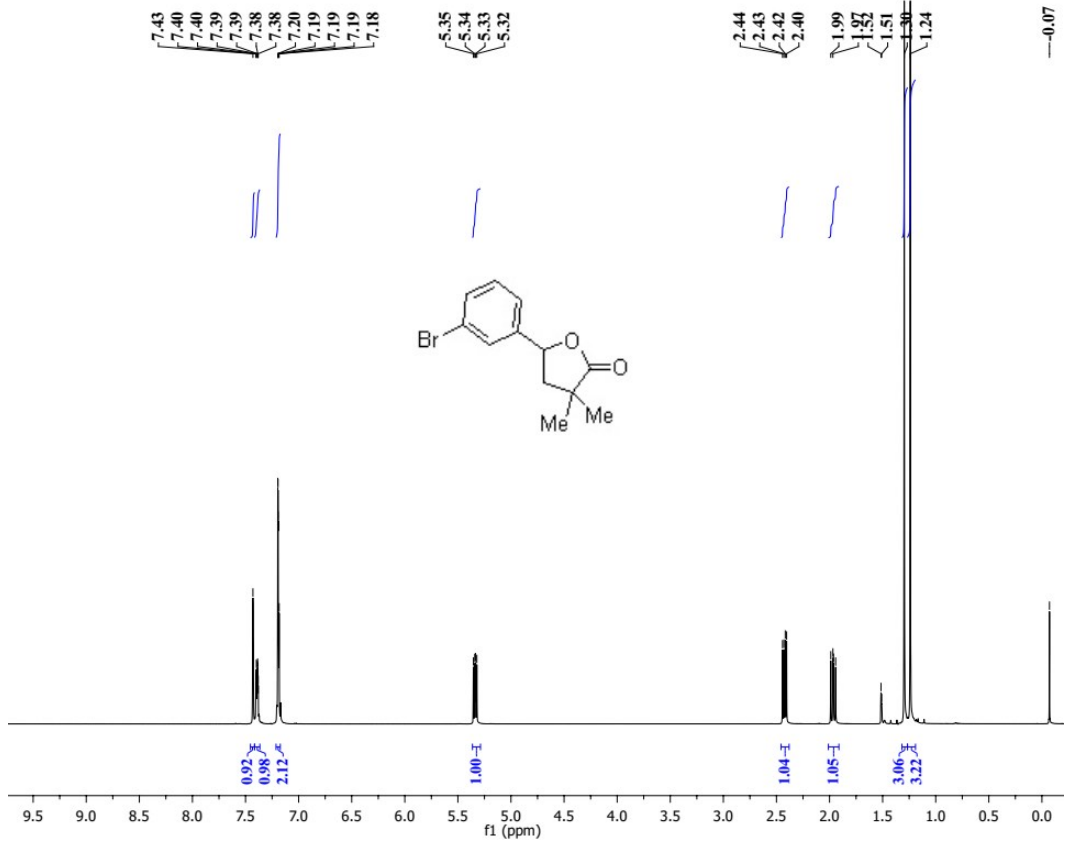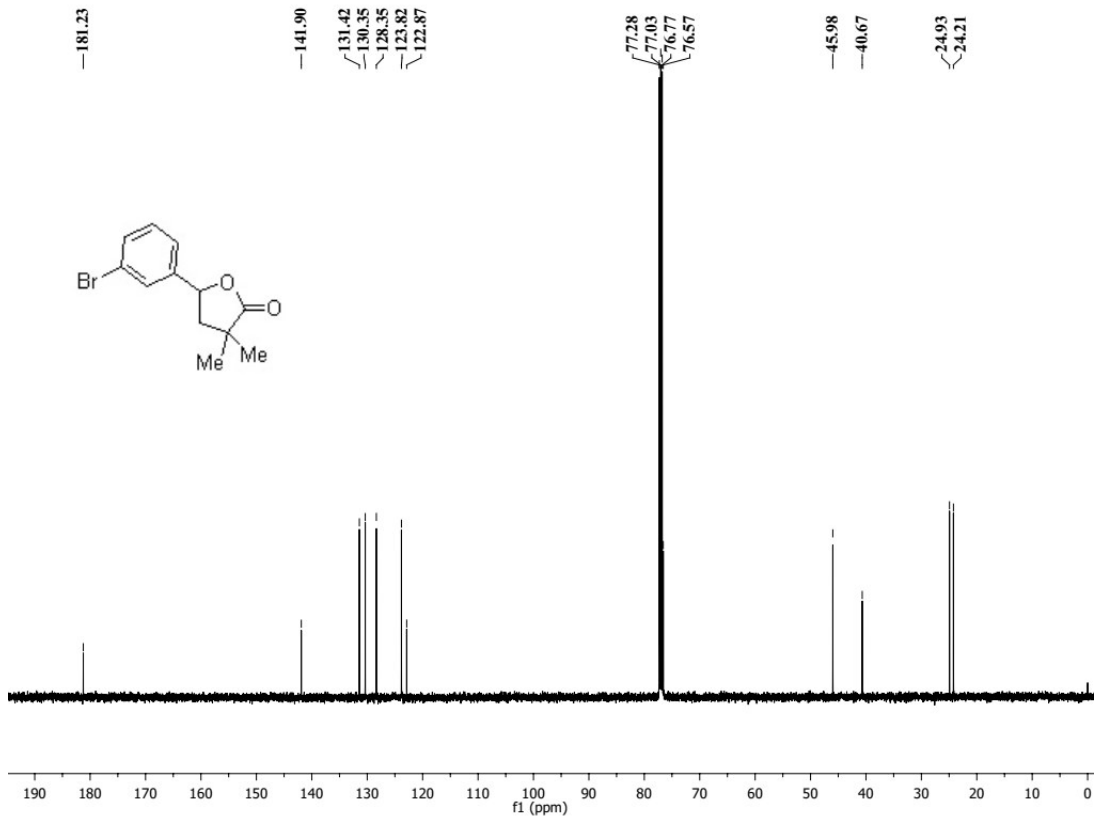

**4-(4,4-Dimethyl-5-oxotetrahydrofuran-2-yl)phenyl acetate (5e)**

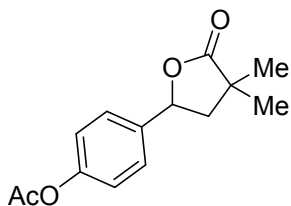

95 mg (77%); colorless oil.  $^1\text{H}$  NMR (500 MHz,  $\text{CDCl}_3$ , ppm)  $\delta$  7.28 (d,  $J = 8.4$  Hz, 2H), 7.04 (d,  $J = 8.6$  Hz, 2H), 5.37 (dd,  $J = 10.0, 6.3$  Hz, 1H), 2.41 (dd,  $J = 12.9, 6.3$  Hz, 1H), 2.23 (s, 3H), 1.99 (dd,  $J = 12.8, 10.1$  Hz, 1H), 1.30 (s, 3H), 1.24 (s, 3H).  $^{13}\text{C}$  NMR (126 MHz,  $\text{CDCl}_3$ )  $\delta$  181.5, 169.4, 150.6, 137.0, 126.5, 121.9, 77.1, 46.1, 40.8, 25.0, 24.2, 21.1. HRMS (ESI) calcd. for  $\text{C}_{14}\text{H}_{17}\text{O}_4$   $[\text{M}+\text{H}]^+$ : 249.2855; found: 249.2849.

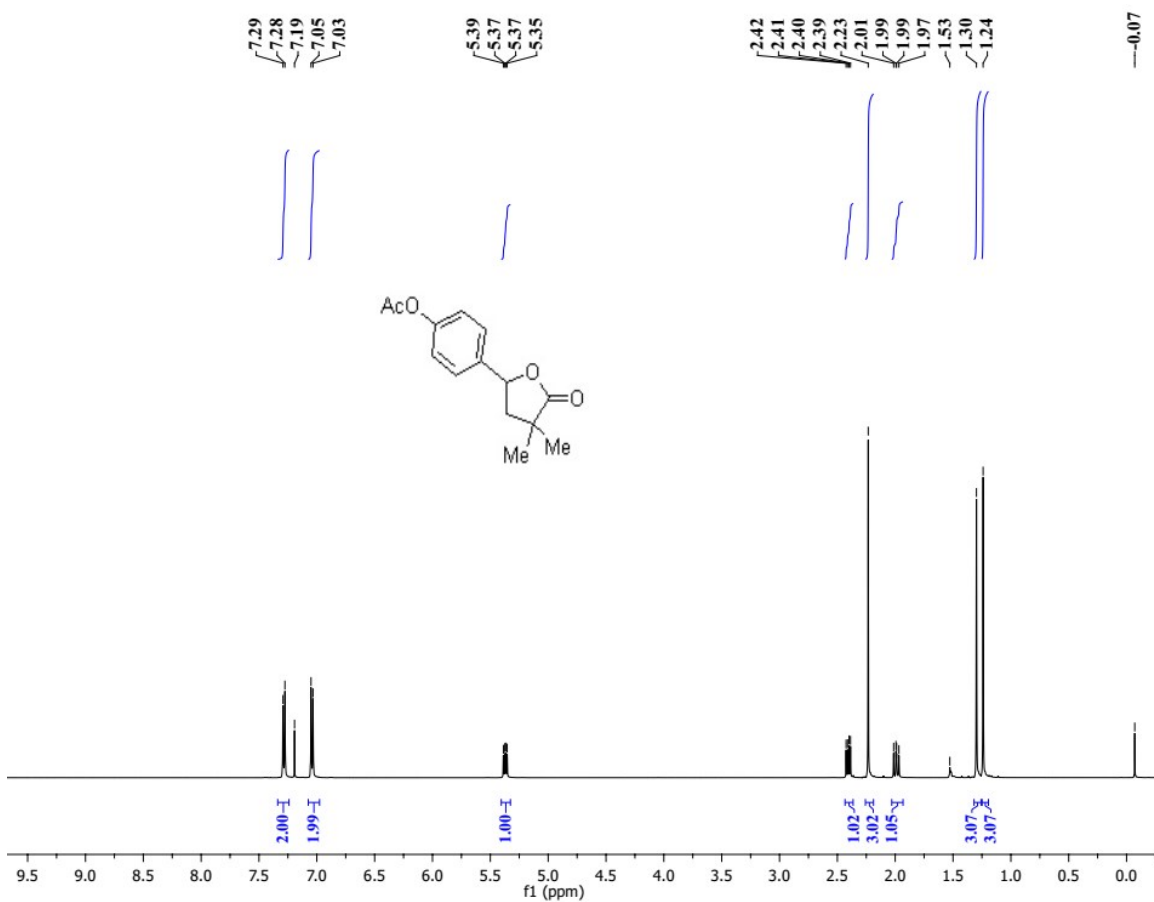

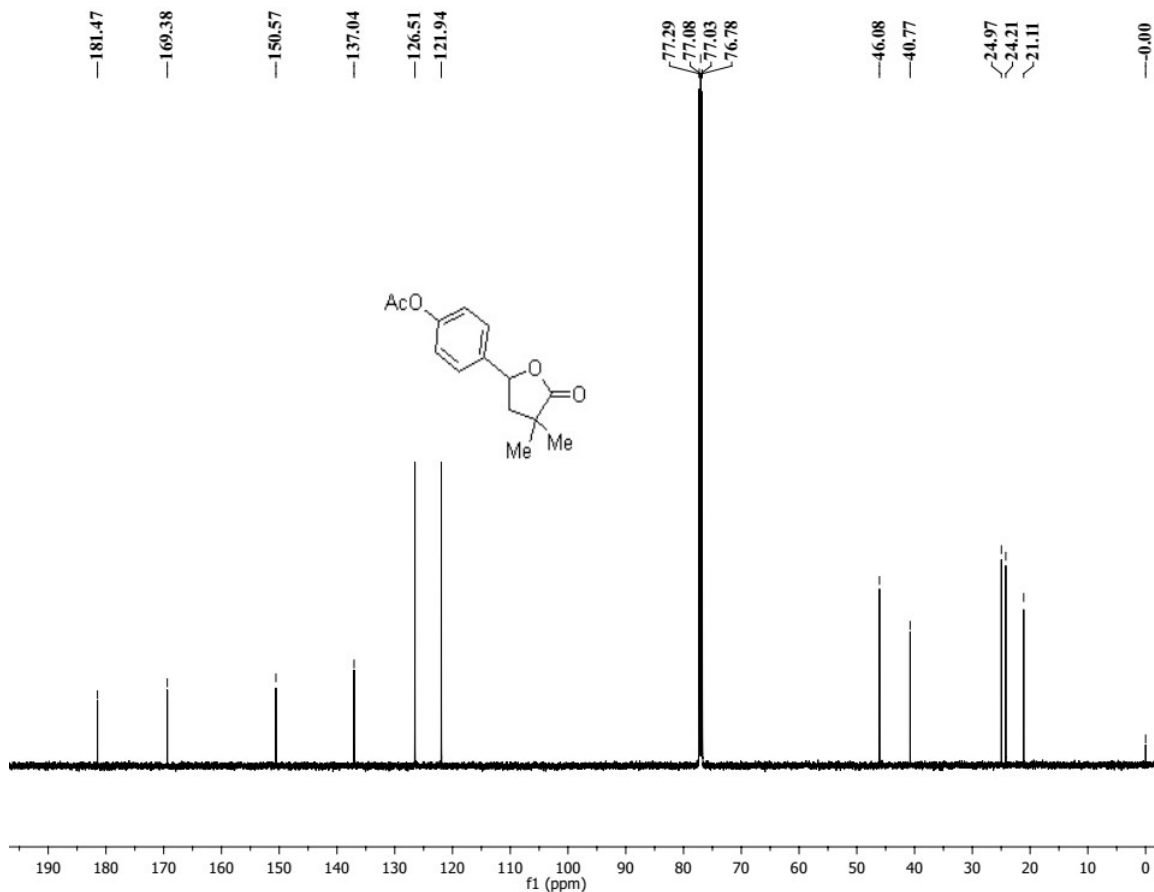

**3,3-Dimethyl-5-(3-nitrophenyl)dihydrofuran-2(3H)-one (5f)**

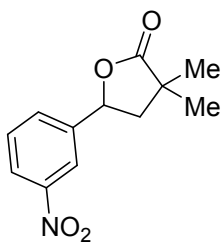

56 mg (48%); light yellow oil which slowly solidified under air.  $^1\text{H}$  NMR (500 MHz,  $\text{CDCl}_3$ , ppm)  $\delta$  8.22 – 8.21 (m, 1H), 8.20 – 8.18 (m, 1H), 7.72 (d,  $J = 8.0$  Hz, 1H), 7.60 (t,  $J = 8.0$  Hz, 1H), 5.56 (dd,  $J = 10.0, 6.0$  Hz, 1H), 2.61 (dd,  $J = 12.5, 6.0$  Hz, 1H), 2.07 (dd,  $J = 12.5, 10.0$  Hz, 1H), 1.41 (s, 3H), 1.34 (s, 3H).  $^{13}\text{C}$  NMR (125 MHz,  $\text{CDCl}_3$ , ppm)  $\delta$  180.9, 148.5, 141.8, 131.3, 129.9, 123.2, 120.4, 76.2, 45.8, 40.7, 24.8, 24.1

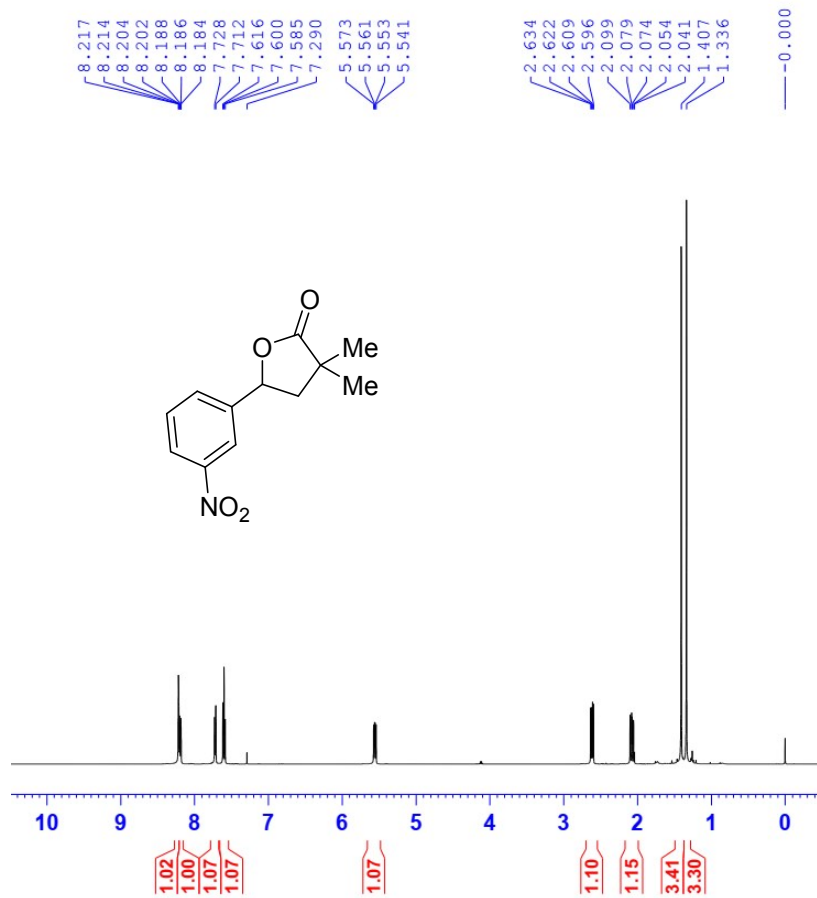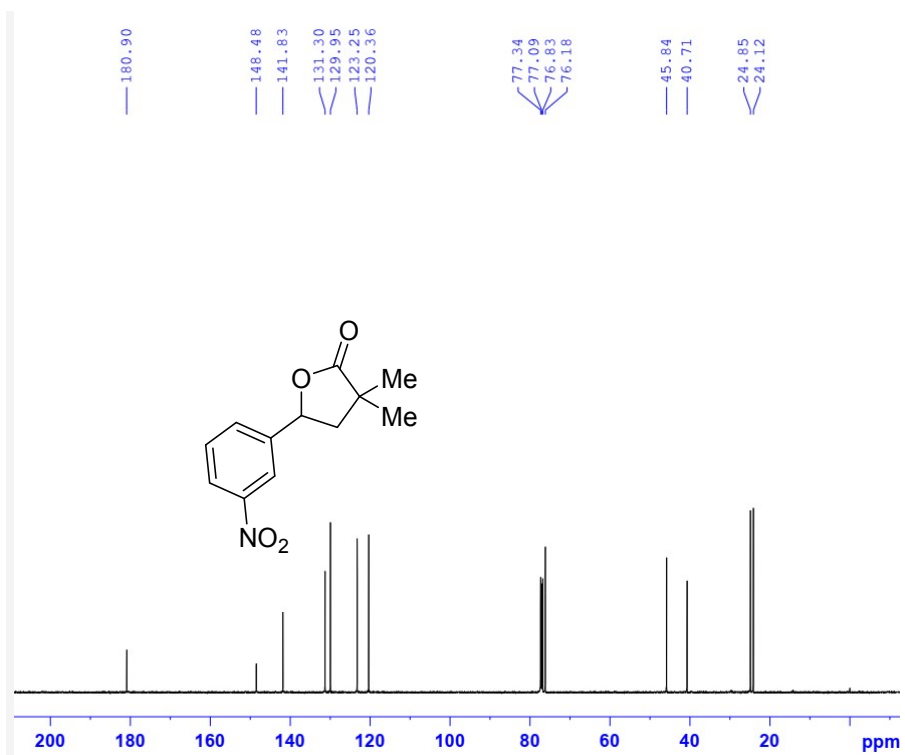

### 3,3-Dimethyl-5-(naphthalen-2-yl)dihydrofuran-2(3H)-one (5h)<sup>3</sup>

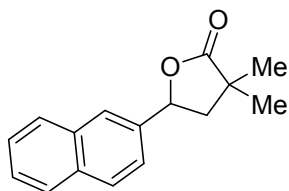

110 mg (92%); white solid. M.p. 120-122 °C. <sup>1</sup>H NMR (500 MHz, CDCl<sub>3</sub>, ppm) δ 7.90 – 7.81 (m, 4H), 7.54 – 7.46 (m, 2H), 7.41 (dd, *J* = 8.5, 1.5 Hz, 1H), 5.62 (dd, *J* = 10.0, 6.5 Hz, 1H), 2.56 (dd, *J* = 13.0, 6.5 Hz, 1H), 2.16 (dd, *J* = 13.0, 10.0 Hz, 1H), 1.41 (s, 3H), 1.33 (s, 3H). <sup>13</sup>C NMR (125 MHz, CDCl<sub>3</sub>, ppm) δ 137.0, 133.3, 133.2, 128.9, 128.2, 127.9, 126.7, 126.5, 124.5, 123.0, 77.9, 46.2, 40.9, 25.2, 24.5.

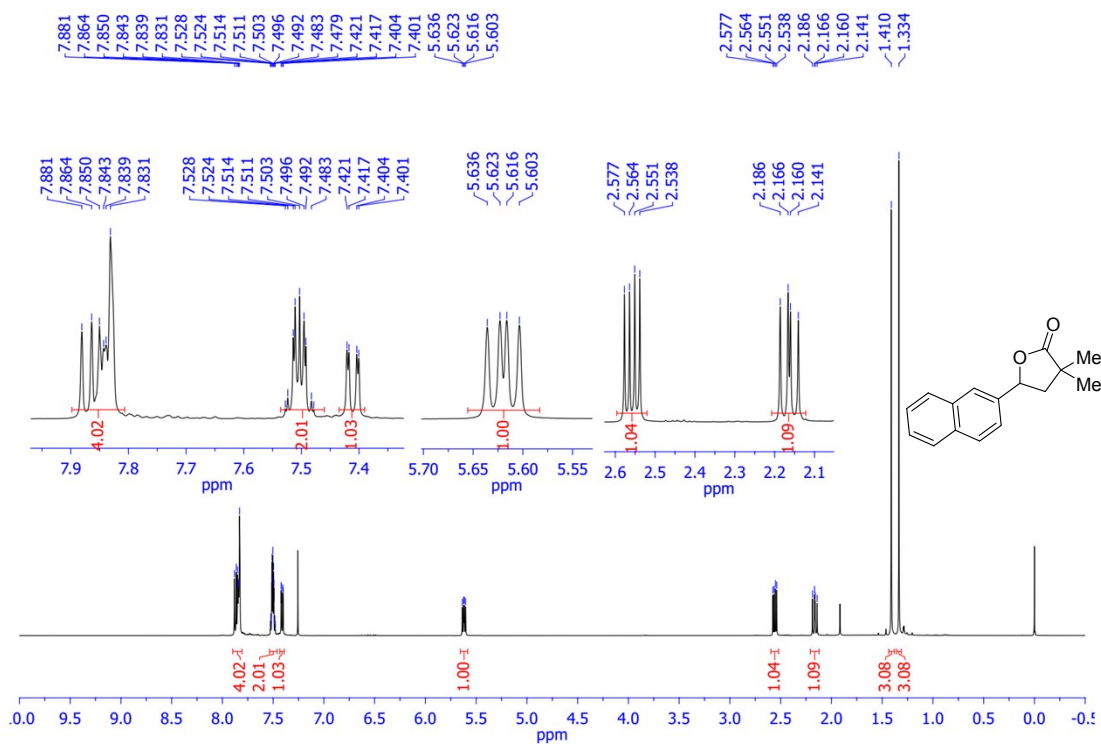



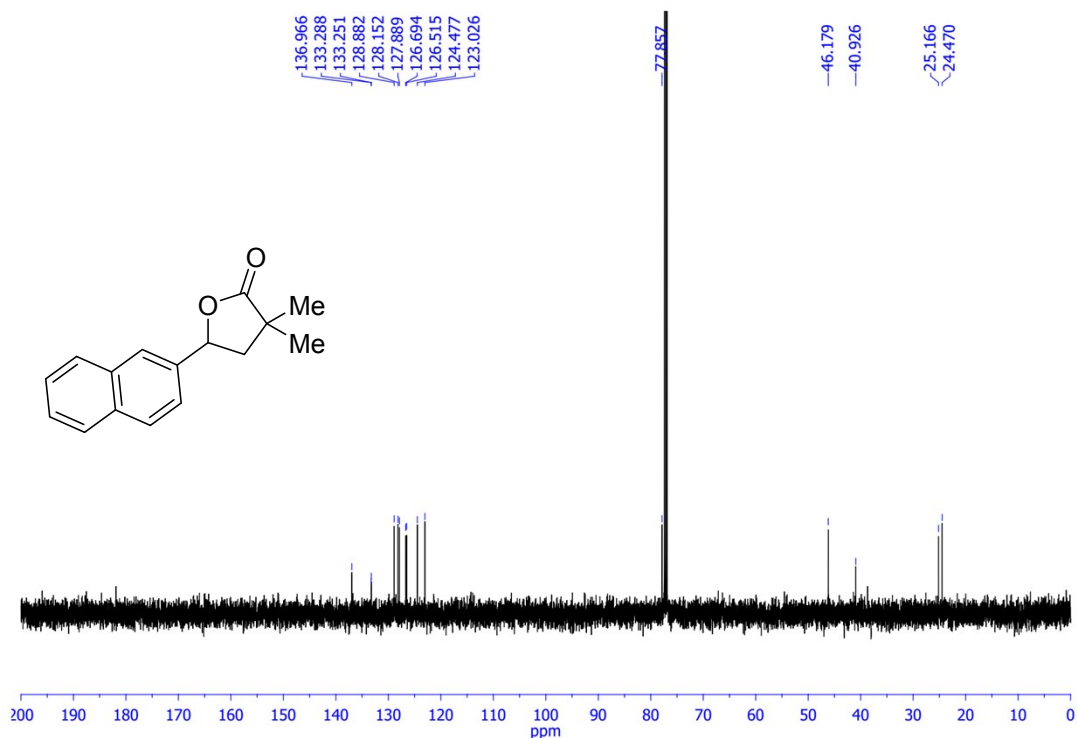

### 3,3-Dimethyl-5-(4-methylthiazol-5-yl)isoxazolidin-2-one (5i)<sup>4</sup>

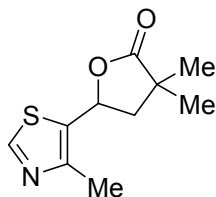

64 mg (61%); colorless oil which slowly solidified under air. <sup>1</sup>H NMR (500 MHz, CDCl<sub>3</sub>, ppm) δ 8.71 (s, 1H), 5.70 (dd, *J* = 10.0, 6.0 Hz, 1H), 2.56 (dd, *J* = 12.5, 6.0 Hz, 1H), 2.49 (s, 3H), 2.14 (dd, *J* = 12.5, 10.0 Hz, 1H), 1.38 (s, 3H), 1.36 (s, 3H). <sup>13</sup>C NMR (125 MHz, CDCl<sub>3</sub>, ppm) δ 180.5, 151.64, 151.58, 129.8, 71.3, 46.4, 40.8, 24.9, 24.0, 15.4.

<sup>4</sup> Pan, G.-H.; Song, R.-J.; Li, J.-H. *Org. Chem. Front.* **2018**, *5*, 179.

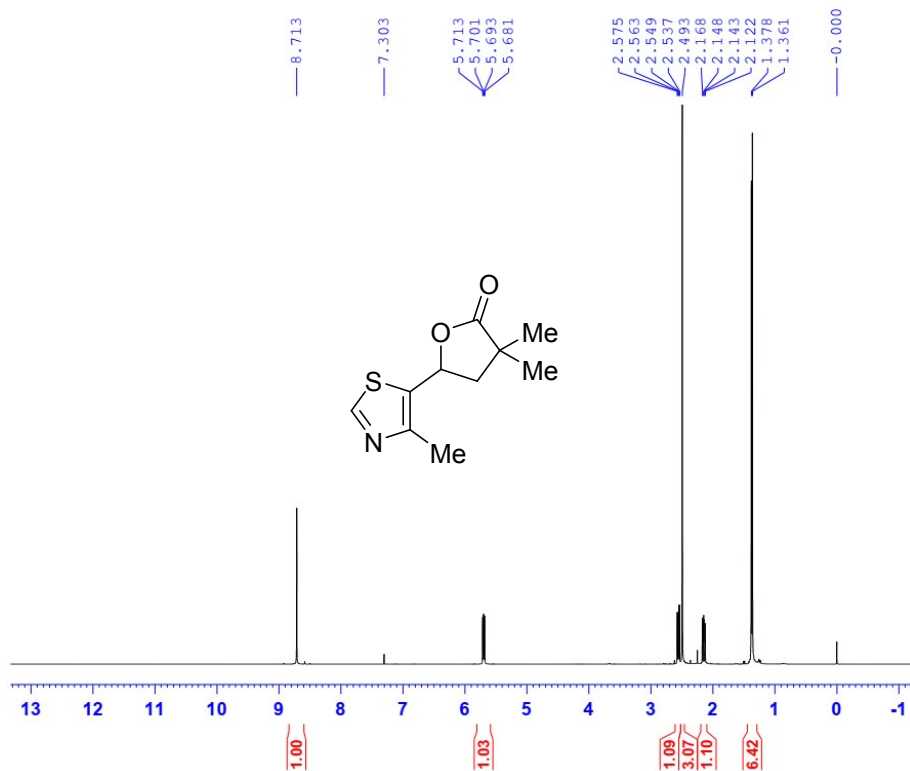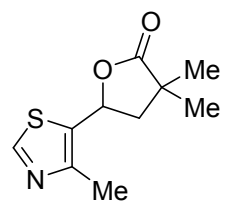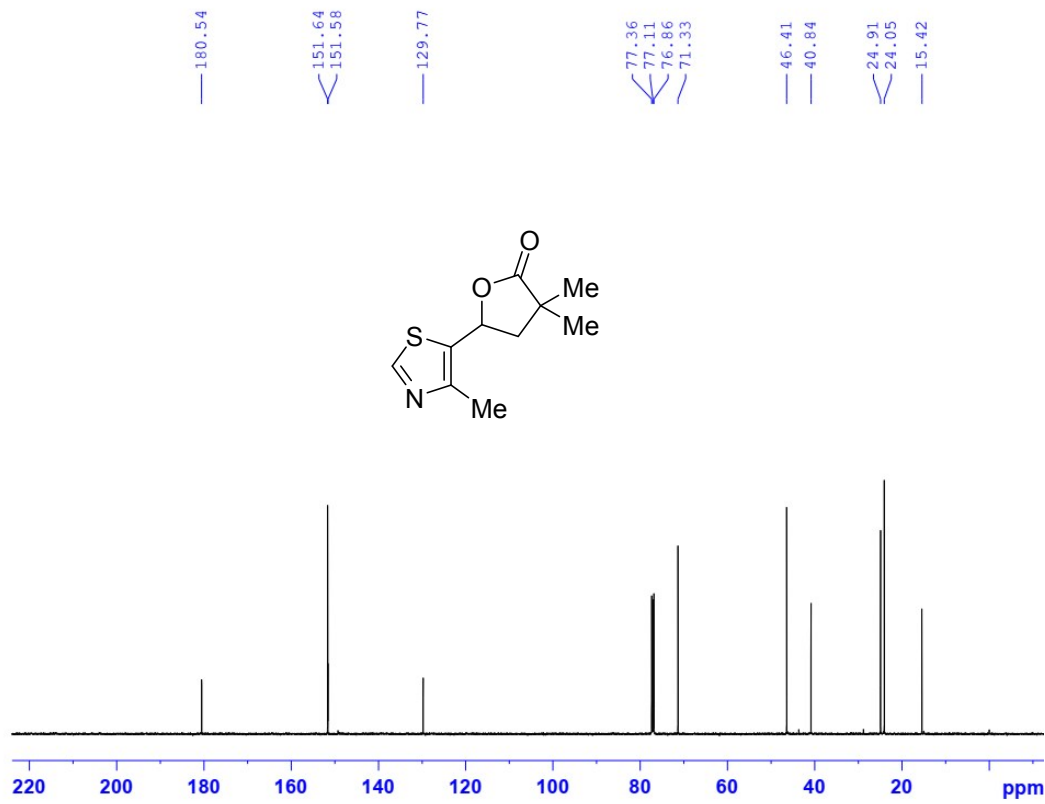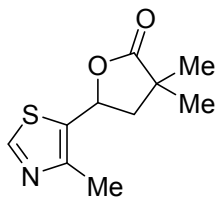

**3,3-Dimethyl-5-(*p*-tolyl)dihydrofuran-2(3*H*)-one (5k)<sup>3</sup>**

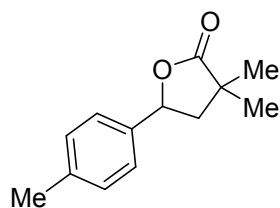

82 mg (80%); colorless oil. <sup>1</sup>H NMR (500 MHz, CDCl<sub>3</sub>, ppm) δ 7.19 – 7.14 (m, 2H), 7.12 (d, *J* = 8.0 Hz, 2H), 5.34 (dd, *J* = 10.0, 6.0 Hz, 1H), 2.38 (dd, *J* = 13.0, 6.0 Hz, 1H), 2.28 (s, 3H), 1.99 (dd, *J* = 13.0, 10.0 Hz, 1H), 1.29 (s, 3H), 1.23 (s, 3H). <sup>13</sup>C NMR (125 MHz, CDCl<sub>3</sub>, ppm) δ 181.8, 138.2, 136.4, 129.4, 125.4, 77.7, 46.1, 40.8, 25.0, 24.2, 21.2.

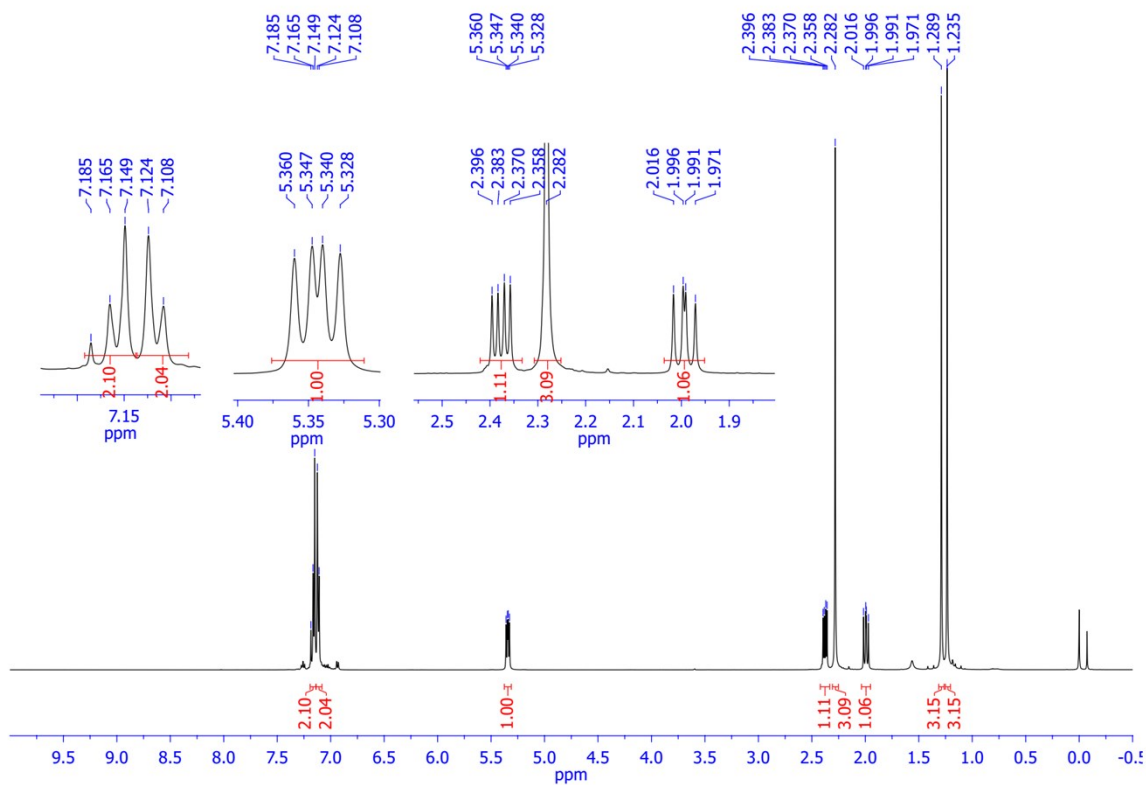

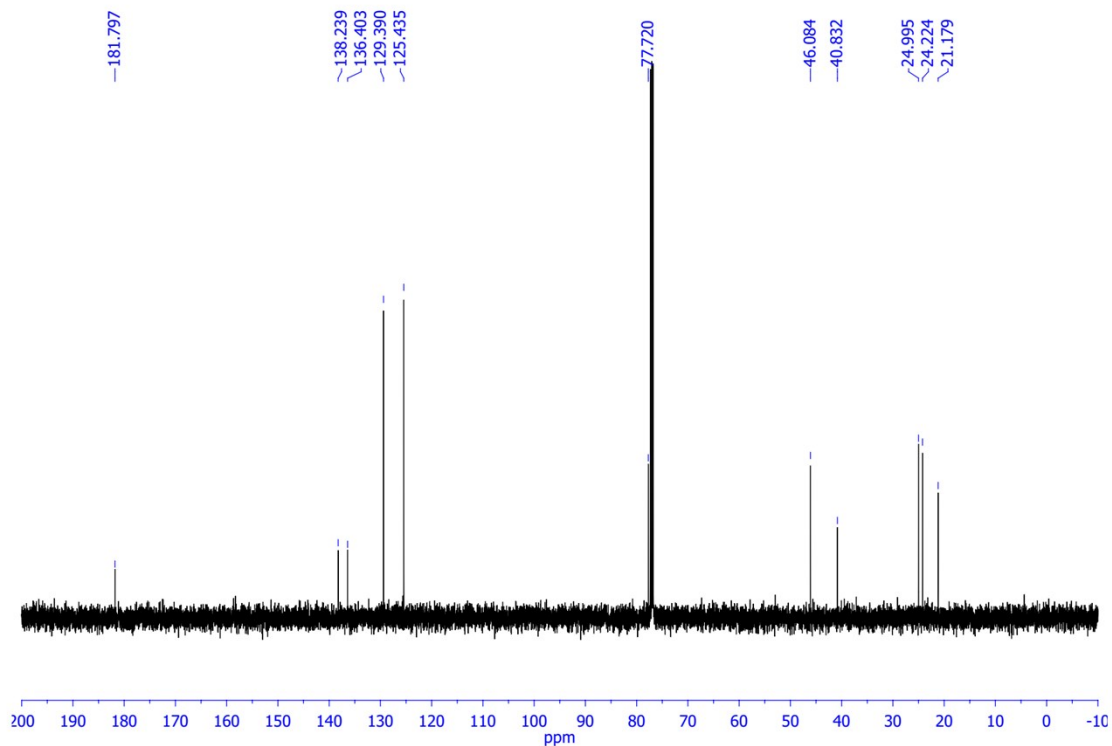

**5-(4-Methoxyphenyl)-3,3-dimethyl-2-oxo-1,3-dioxolane (3c)<sup>3</sup>**

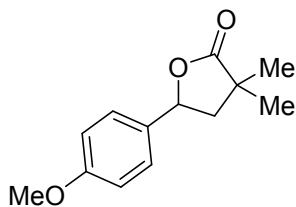

92 mg (84%); colorless oil. <sup>1</sup>H NMR (500 MHz, CDCl<sub>3</sub>, ppm) δ 7.27 (d, *J* = 8.5 Hz, 2H), 6.91 (d, *J* = 8.5 Hz, 2H), 5.40 (dd, *J* = 10.5, 6.0 Hz, 1H), 3.81 (s, 3H), 2.43 (dd, *J* = 12.5, 6.0 Hz, 1H), 2.08 (dd, *J* = 12.5, 10.5 Hz, 1H), 1.36 (s, 3H), 1.32 (s, 3H). <sup>13</sup>C NMR (125 MHz, CDCl<sub>3</sub>, ppm) δ 181.7, 159.7, 131.2, 127.0, 114.1, 77.7, 55.3, 46.0, 40.9, 25.0, 24.2.

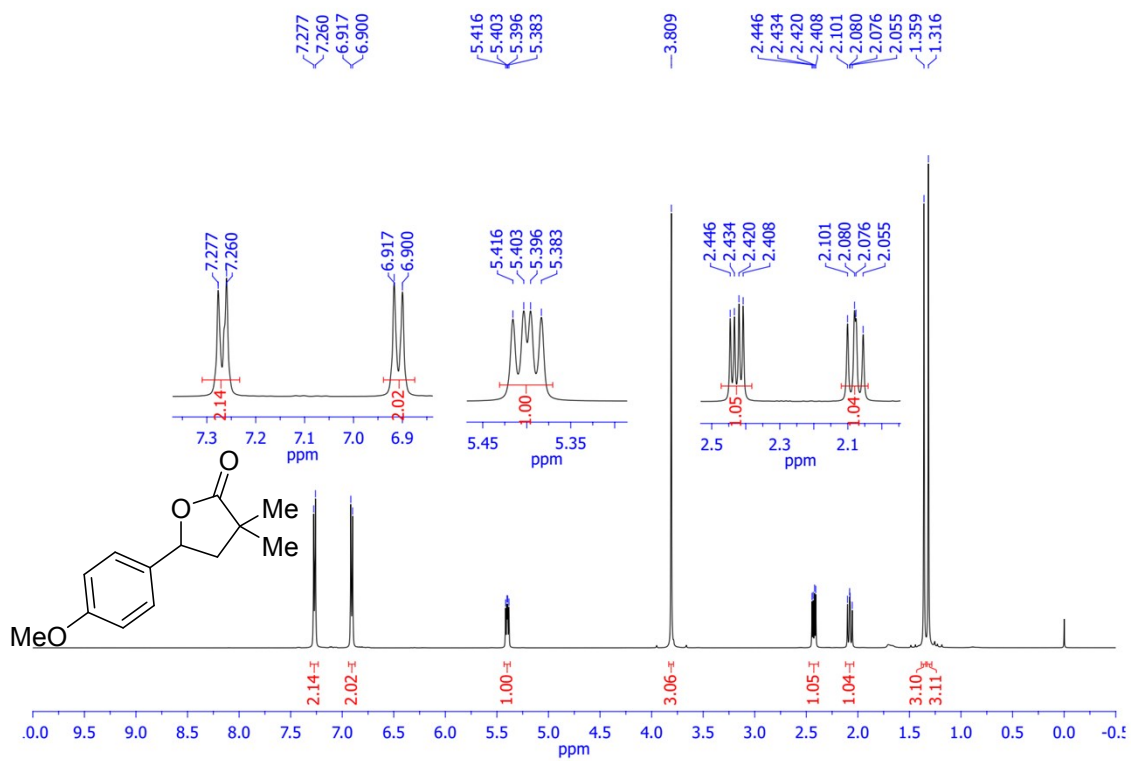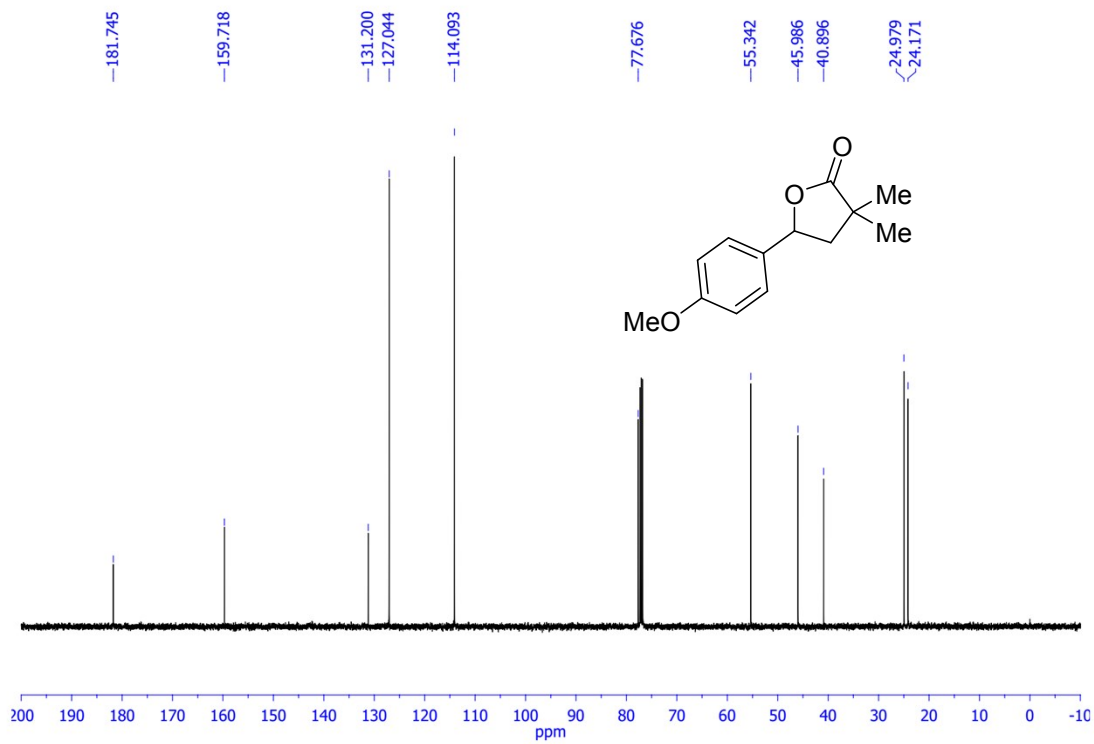

Ethyl 2,2-dimethyl-4,4-diphenylbut-3-enoate (7a)<sup>5</sup>

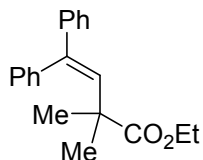

100 mg (68%); colorless oil.  $^1\text{H}$  NMR (500 MHz,  $\text{CDCl}_3$ , ppm)  $\delta$  7.30 – 7.22 (m, 3H), 7.22 – 7.11 (m, 5H, overlapping with  $\text{CHCl}_3$  signal), 7.11 – 7.05 (m, 2H), 6.04 (s, 1H), 3.67 (q,  $J = 7.1$  Hz, 2H), 1.24 (s, 6H), 1.07 (t,  $J = 7.1$  Hz, 3H).  $^{13}\text{C}$  NMR (126 MHz,  $\text{CDCl}_3$ , ppm)  $\delta$  176.4, 143.4, 141.5, 139.3, 134.2, 130.1, 128.0, 127.8, 127.25, 127.24, 127.1, 60.4, 44.0, 27.8, 13.9.

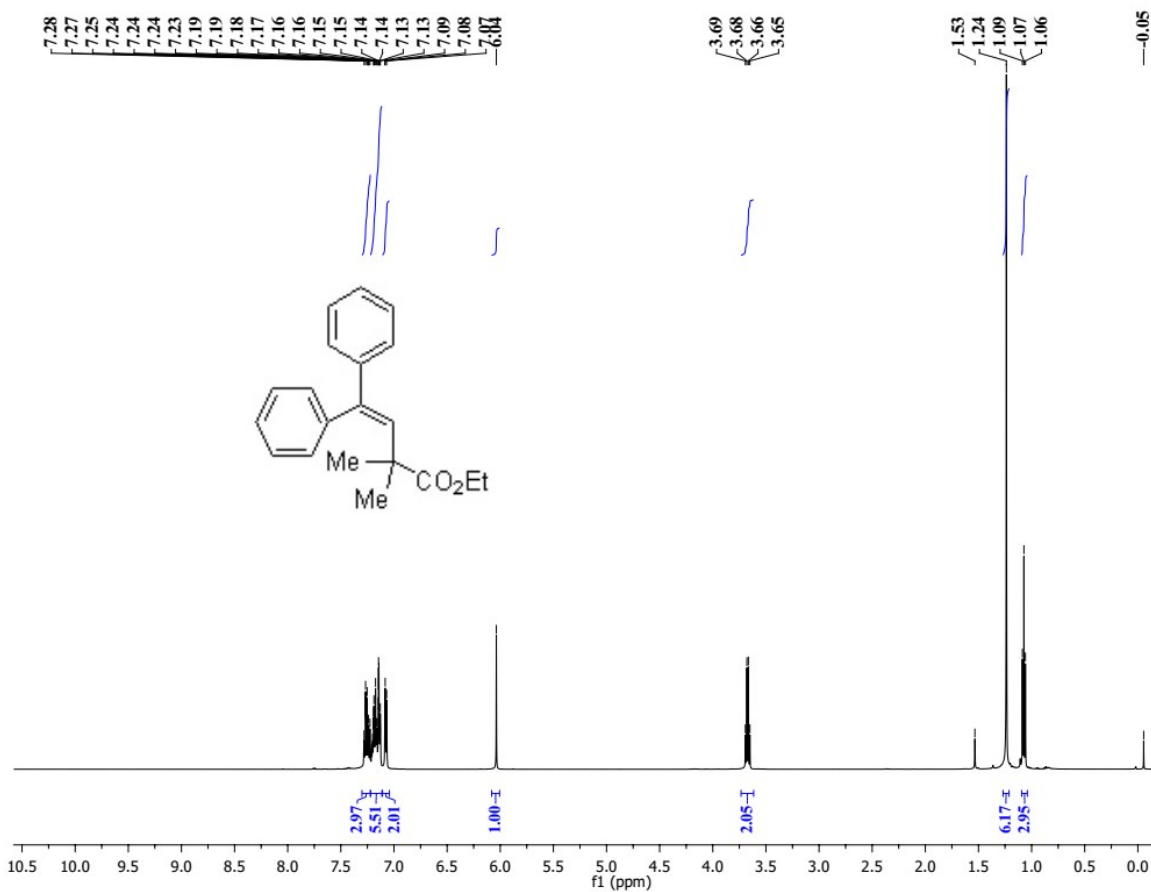

<sup>5</sup> Liu, C.; Tang, S.; Liu, D.; Yuan, J.; Zheng, L.; Meng, L.; Lei, A. *Angew. Chem. Int. Ed.* **2012**, *51*, 3638.

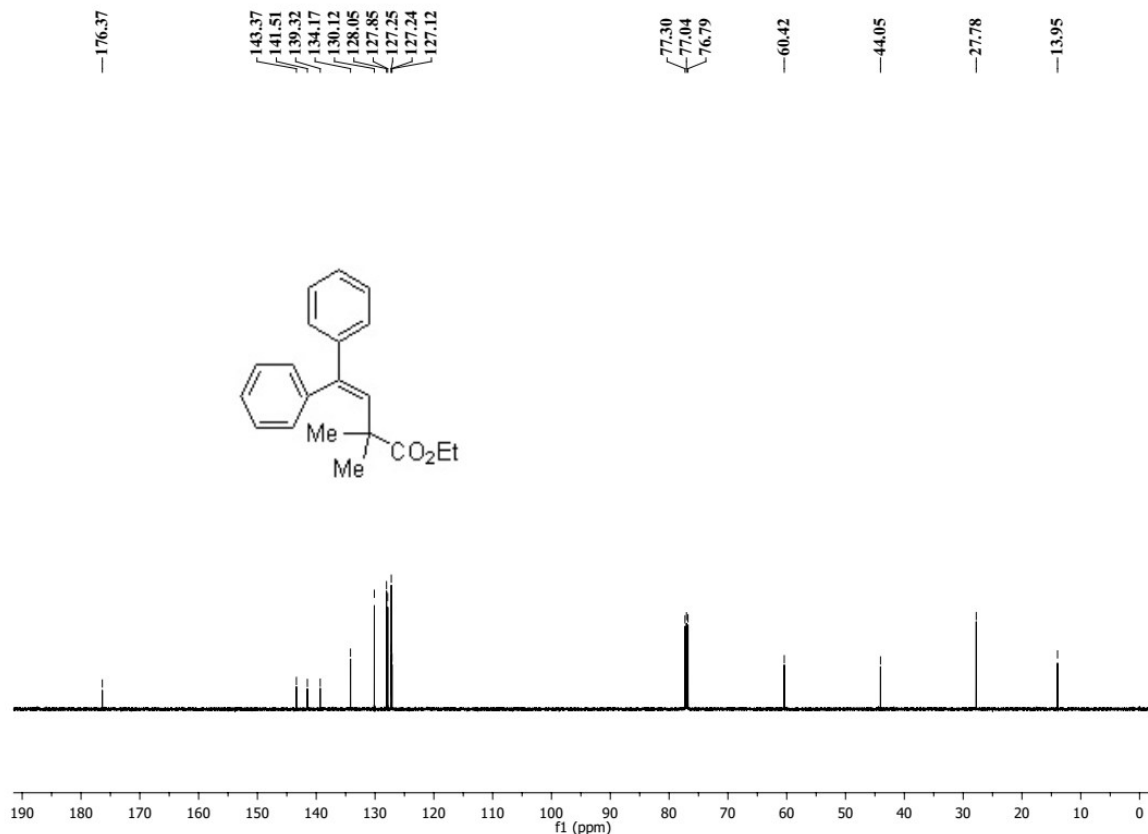

### Ethyl 2,2-diethyl-4,4-diphenylbut-3-enoate (7b)

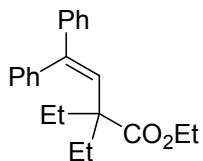

114 mg (71%); colorless oil.  $^1\text{H}$  NMR (500 MHz,  $\text{CDCl}_3$ , ppm)  $\delta$  7.28 – 7.21 (m, 2H), 7.19 – 7.12 (m, 5H, overlapping with  $\text{CHCl}_3$  signal), 7.08 – 7.03 (m, 2H), 6.12 (s, 1H), 3.78 (q,  $J = 7.1$  Hz, 2H), 1.69 – 1.56 (m, 4H), 1.09 (t,  $J = 7.1$  Hz, 3H), 0.74 (t,  $J = 7.5$  Hz, 6H).  $^{13}\text{C}$  NMR (125 MHz,  $\text{CDCl}_3$ , ppm)  $\delta$  175.6, 143.6, 141.9, 139.7, 131.8, 129.6, 128.0, 127.8, 127.19, 127.18, 127.0, 60.2, 52.1, 29.2, 14.1, 8.8. HRMS (ESI) calcd. for  $\text{C}_{22}\text{H}_{27}\text{O}_2$   $[\text{M}+\text{H}]^+$  323.2006; found: 323.2012.

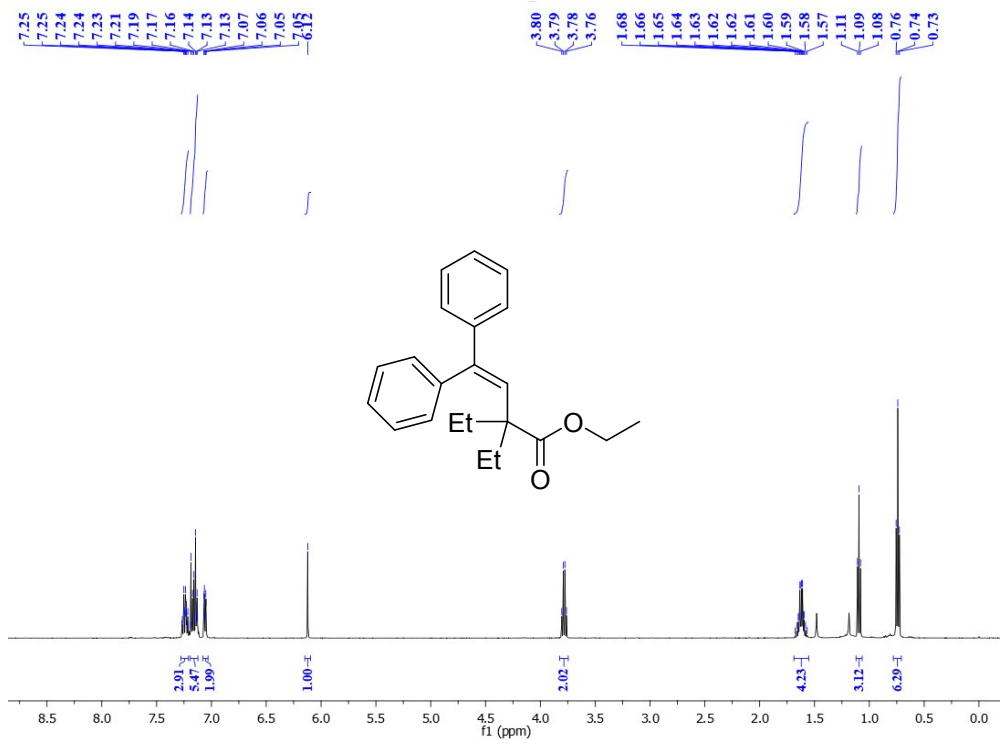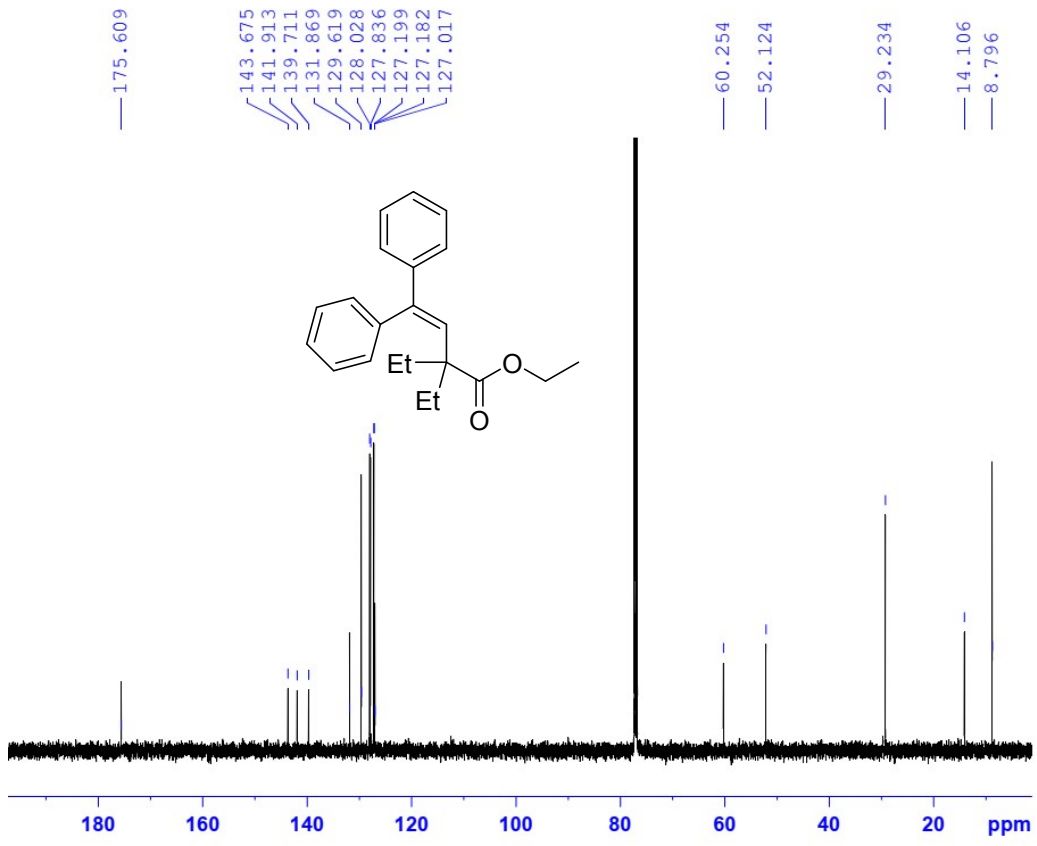



### Ethyl 1-(2,2-diphenylvinyl)cyclobutane-1-carboxylate (7c)

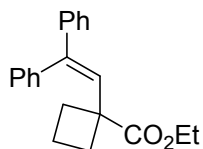

122 mg (80%); colorless oil.  $^1\text{H}$  NMR (500 MHz,  $\text{CDCl}_3$ , ppm)  $\delta$  7.37 – 7.24 (m, 8H, overlapping with  $\text{CHCl}_3$  signal), 7.11 (dd,  $J = 7.7, 1.5$  Hz, 2H), 6.27 (s, 1H), 4.06 (q,  $J = 7.1$  Hz, 2H), 2.37 – 2.29 (m, 2H), 2.05 (dt,  $J = 9.4, 5.6$  Hz, 2H), 1.93 (ddd,  $J = 17.3, 10.9, 8.8$  Hz, 1H), 1.74 (dtd,  $J = 15.5, 9.2, 4.4$  Hz, 1H), 1.25 (t,  $J = 7.1$  Hz, 3H).  $^{13}\text{C}$  NMR (126 MHz,  $\text{CDCl}_3$ , ppm)  $\delta$  175.9, 142.9, 141.7, 139.3, 132.3, 130.1, 128.1, 127.9, 127.7, 127.4, 127.2, 60.7, 49.7, 32.9, 16.3, 14.1. HRMS (ESI) calcd. for  $\text{C}_{21}\text{H}_{23}\text{O}_2$   $[\text{M}+\text{H}]^+$  307.1693; found: 307.1690.

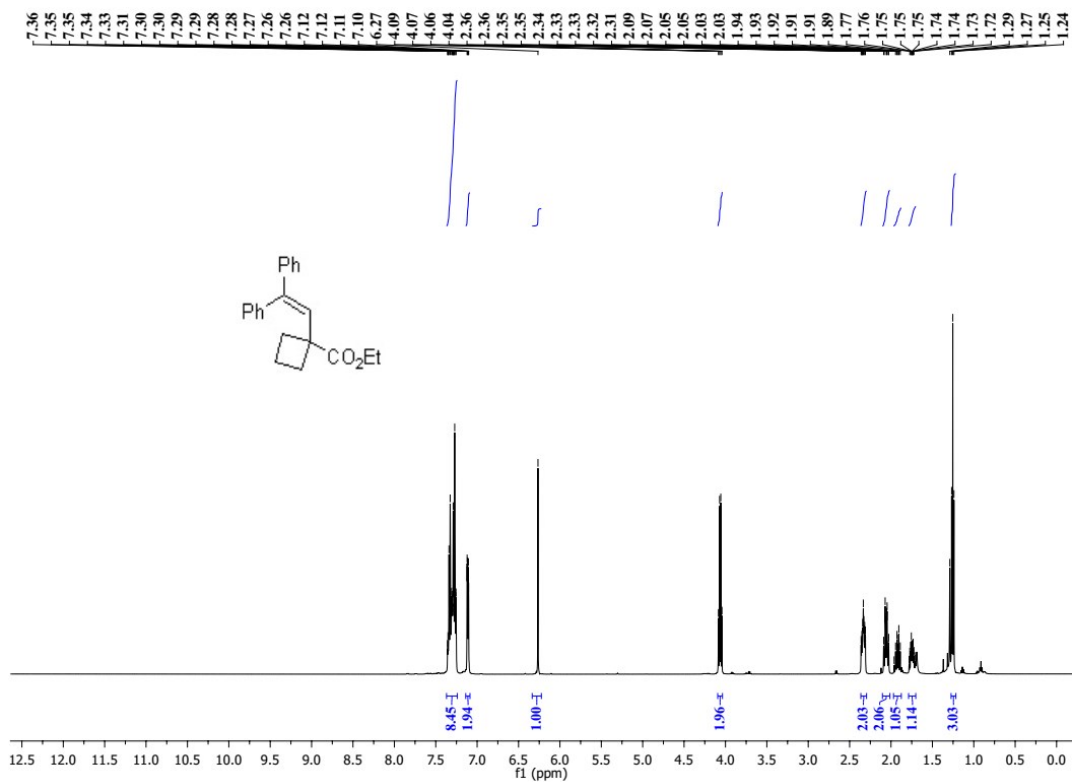

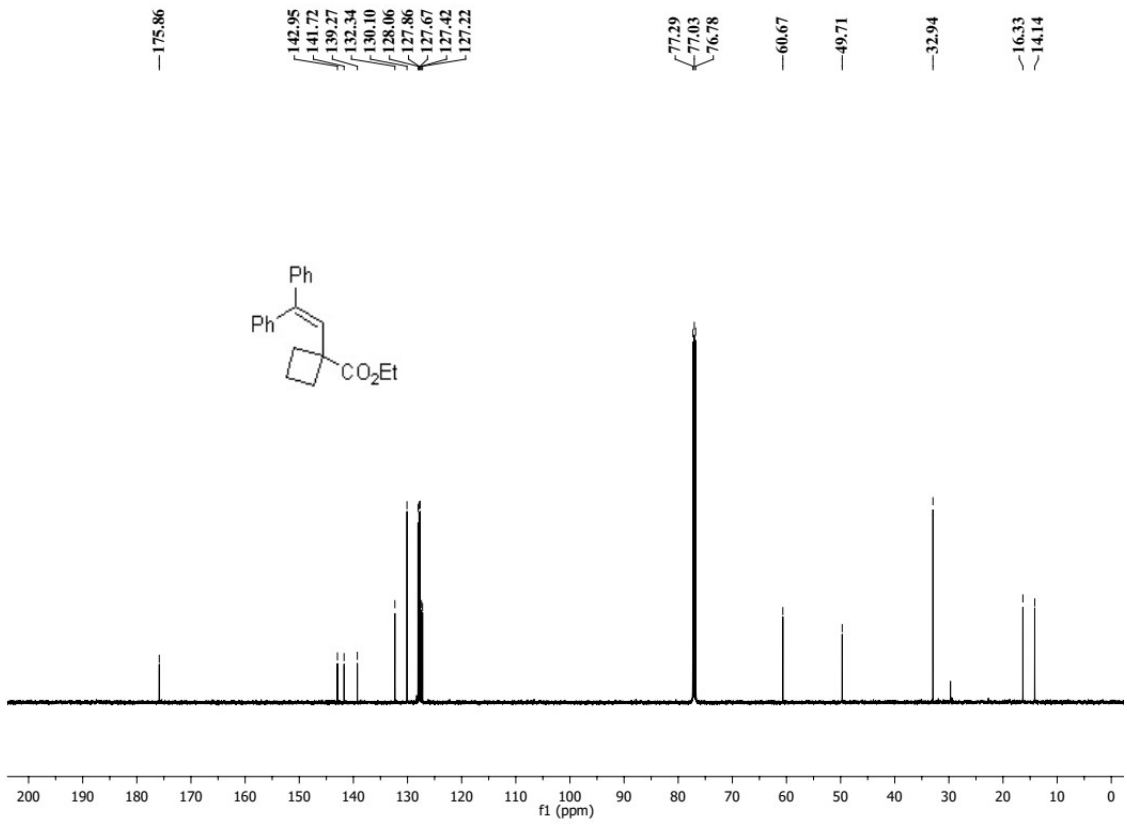

Supplement: d0ra09588e1.pdf [file d0ra09588e1.pdf]
